# Supplementary material
Source: Royal Society of Chemistry journal article supplement (doi:10.1039/d6cp00313c)
Supplement: d6cp00313c1.pdf [file d6cp00313c1.pdf]

## Supplementary Information

### Dissecting Urea-RNA Interactions in SARS-CoV-2 Virus: Nucleobases as the Primary Denaturation Hotspots

Omkar Singh<sup>a,b,\*</sup> and Pushyaraga P Venugopal<sup>a,b</sup>

<sup>a</sup>Computational Chemistry Laboratory, Department of Chemistry, GLA University

<sup>b</sup>Department of Chemistry, Indian Institute of Technology Bombay, Powai, India

#### \*Correspondence:

Dr Omkar Singh

<sup>†</sup>Department of Chemistry, Indian Institute of Technology Bombay, 400076.

email id: [omkantnirala92@gmail.com](mailto:omkantnirala92@gmail.com)

ORCID ID: <https://orcid.org/0000-0002-2943-0405>

## Section 1

### Methods

#### Method 1

##### Urea Parameter

; Created by cgenff\_charmm2gmx.py

[ moleculetype ]

; Name nrexcl

Urea 3

[ atoms ]

| ; nr      | type | resnr | residue  | atom   | cgmr   | charge | mass | typeB | chargeB | massB |
|-----------|------|-------|----------|--------|--------|--------|------|-------|---------|-------|
| ; residue | 1    | Urea  | rtp Urea | q qsum |        |        |      |       |         |       |
| 1         | 1    | Urea  | N1       | 1      | -0.690 | 14.007 | ;    |       |         |       |
| 2         | 1    | Urea  | C        | 2      | 0.600  | 12.011 | ;    |       |         |       |
| 3         | 1    | Urea  | N2       | 3      | -0.690 | 14.007 | ;    |       |         |       |
| 4         | 1    | Urea  | O        | 4      | -0.580 | 15.999 | ;    |       |         |       |
| 5         | 1    | Urea  | H1       | 5      | 0.340  | 1.008  | ;    |       |         |       |
| 6         | 1    | Urea  | H2       | 6      | 0.340  | 1.008  | ;    |       |         |       |
| 7         | 1    | Urea  | H3       | 7      | 0.340  | 1.008  | ;    |       |         |       |
| 8         | 1    | Urea  | H4       | 8      | 0.340  | 1.008  | ;    |       |         |       |

[ bonds ]

| ; ai | aj | funct | c0 | c1 | c2 | c3 |
|------|----|-------|----|----|----|----|
| 1    | 2  | 1     |    |    |    |    |
| 1    | 5  | 1     |    |    |    |    |
| 1    | 6  | 1     |    |    |    |    |
| 2    | 3  | 1     |    |    |    |    |
| 2    | 4  | 1     |    |    |    |    |
| 3    | 7  | 1     |    |    |    |    |
| 3    | 8  | 1     |    |    |    |    |

[ pairs ]

| ; ai | aj | funct | c0 | c1 | c2 | c3 |
|------|----|-------|----|----|----|----|
| 1    | 7  | 1     |    |    |    |    |
| 1    | 8  | 1     |    |    |    |    |
| 3    | 5  | 1     |    |    |    |    |
| 3    | 6  | 1     |    |    |    |    |
| 4    | 5  | 1     |    |    |    |    |
| 4    | 6  | 1     |    |    |    |    |
| 4    | 7  | 1     |    |    |    |    |
| 4    | 8  | 1     |    |    |    |    |

[ angles ]

| ; ai | aj | ak | funct | c0 | c1 | c2 | c3 |
|------|----|----|-------|----|----|----|----|
| 2    | 1  | 5  | 5     |    |    |    |    |
| 2    | 1  | 6  | 5     |    |    |    |    |
| 5    | 1  | 6  | 5     |    |    |    |    |
| 1    | 2  | 3  | 5     |    |    |    |    |
| 1    | 2  | 4  | 5     |    |    |    |    |

```

3 2 4 5
2 3 7 5
2 3 8 5
7 3 8 5
[ dihedrals ]
; ai aj ak al funct c0 c1 c2 c3 c4 c5
5 1 2 3 9
5 1 2 4 9
6 1 2 3 9
6 1 2 4 9
1 2 3 7 9
1 2 3 8 9
4 2 3 7 9
4 2 3 8 9
[
dihedrals
; ai aj ak al funct c0 c1 c2 c3
2 1 3 4 2

```

## Method 2

### FEL calculation with eRMSD and SASA

eRMSD usually means ensemble RMSD (*effective RMSD*), and it's common in structural biology molecular simulations, mainly in RNA and DNA when comparing multiple structures (an ensemble) rather than just two single structures.

If we have an ensemble of  $M$  structures, the eRMSD is defined as the average RMSD over the ensemble:

$$eRMSD = \sqrt{\frac{1}{M} \sum_{k=1}^M \left( \frac{1}{N} \sum_{i=1}^N |r_i^k - r_i^{ref}|^2 \right)}$$

Where  $M$  = number of structures in the ensemble,  $N$  = number of atoms per structure,  $r_i^k$  = position of atom  $i$  in structure  $k$ . Now we define the CVs, such as SASA and eRMSD, to perform the FEL calculation.

$$FEL = -k_B T \ln P(x, y)$$

Where  $x$  and  $y$  are the probability distribution of the CVs.

### Method 3

#### Preferential Binding

The KB integral helps to understand the mutual affinities between the interacting molecular species in a solution. The KB integrals between components of the system can be expressed using the equation:

$$G_{\alpha\beta} = 4\pi \int_0^{\infty} r^2 [g_{\alpha\beta}(r) - 1] dr$$

where  $g_{\alpha\beta}$  is the radial distribution function, and  $r$  is the interatomic separation. A higher value of  $G_{\alpha\beta}$  indicates the inter-atomic attraction between the species  $\alpha$  and  $\beta$  (either direct or mediated by other components), which is found to be very strong. The  $\alpha$  denotes the water and protein by  $\beta$ , and the cosolvent by  $\gamma$ , so  $v_{\alpha\beta}$ , preferential binding<sup>53,54</sup> of water to protein is given by:

$$v_{\alpha\beta} = \rho_{\alpha}(G_{\alpha\beta} - G_{\beta\gamma})$$

### Method 4

#### Script used in Analysis

The codes are available at github repository:

[https://github.com/Ompal12/Urea\\_induced\\_RNA\\_denaturation/tree/main](https://github.com/Ompal12/Urea_induced_RNA_denaturation/tree/main)

## Section 2

### Figures

#### Graphs of Thermodynamic Equilibrium.

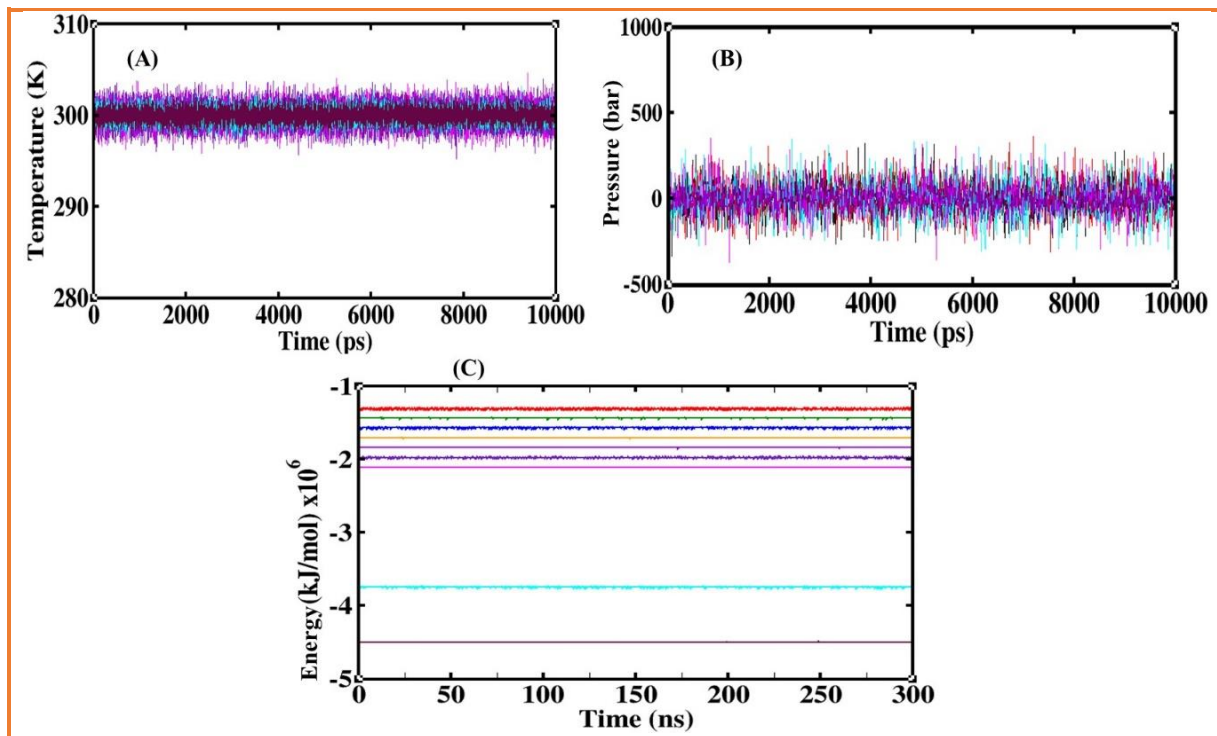

**Figure S1.** The thermodynamic equilibrium graph time evolution of temperature, pressure, and potential energy in all the urea concentrations.

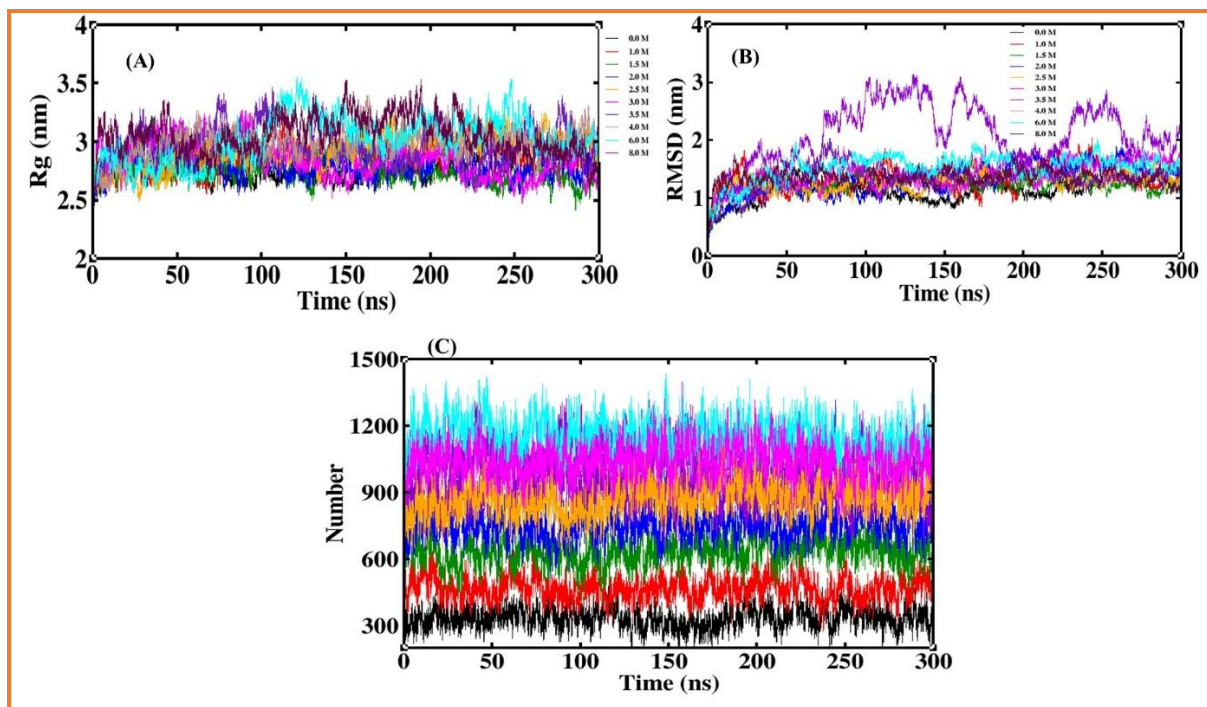

**Figure S2.** (A) Radius of gyration (Rg) and (B) root mean square deviation (RMSD) time evaluation graph. (C) Convergence of the simulation trajectory based on the urea molecules near the 5.4 Å RNA surface cutoff. The urea molecules were found to be constant after a 100 ns simulation.

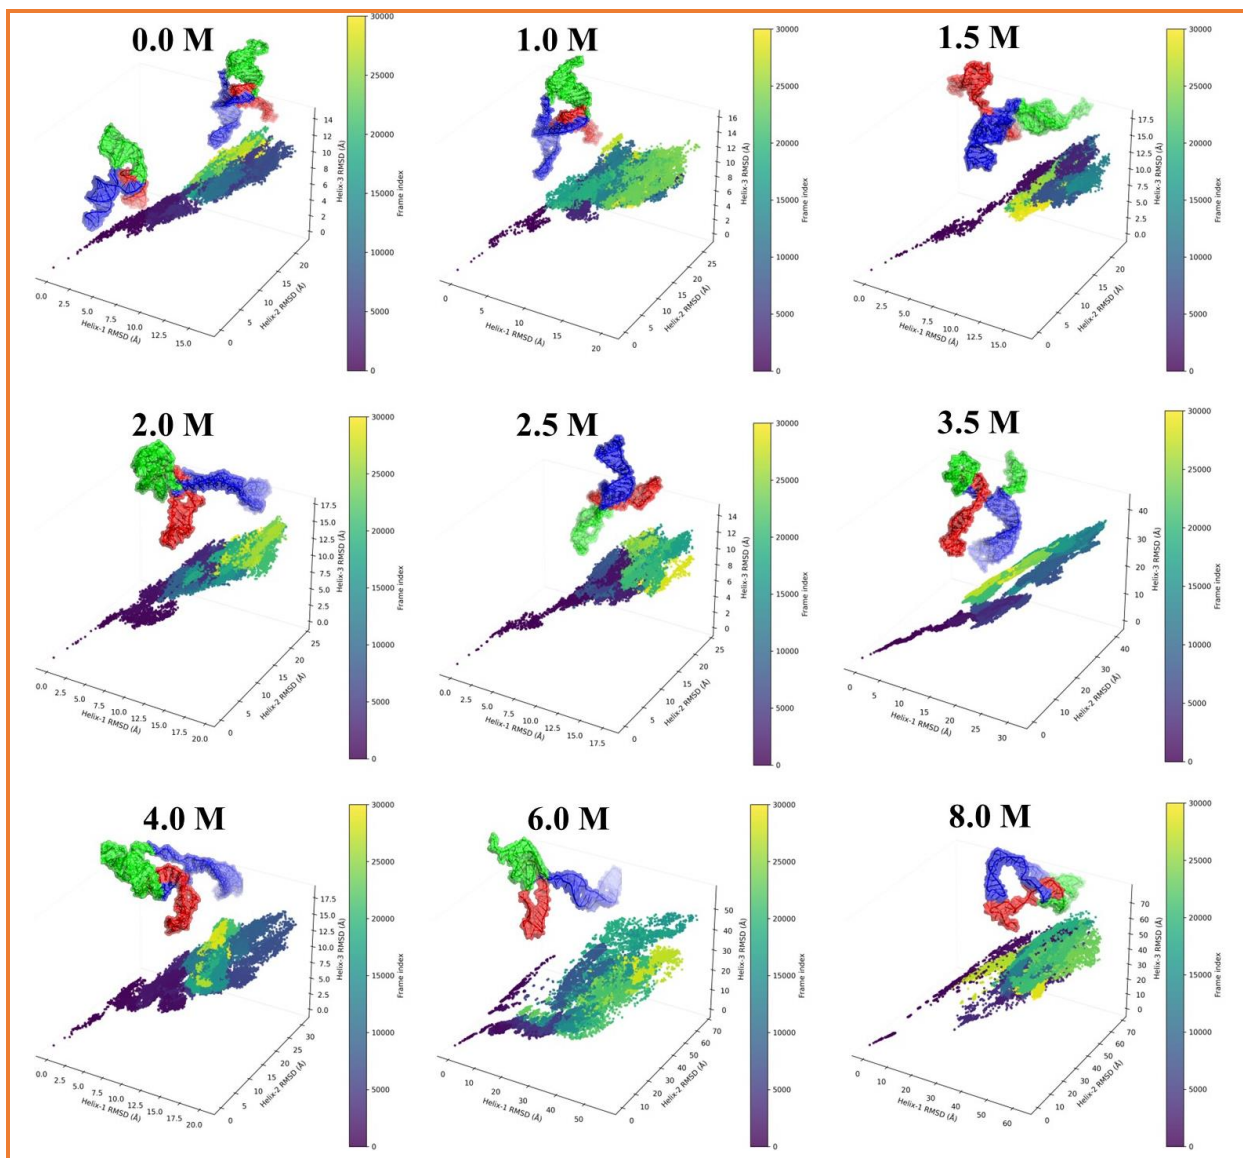

**Figure S3.** 3D plot illustrates the three-dimensional RMSD distributions of individual helical segments as a function of urea concentration. The color bar represents the time frame, and based on that, characterized by low and higher RMSD values across all helices, indicating the conformational topology. The cartoon surface structure represents the max helical RMSD fluctuation from the reference structure.

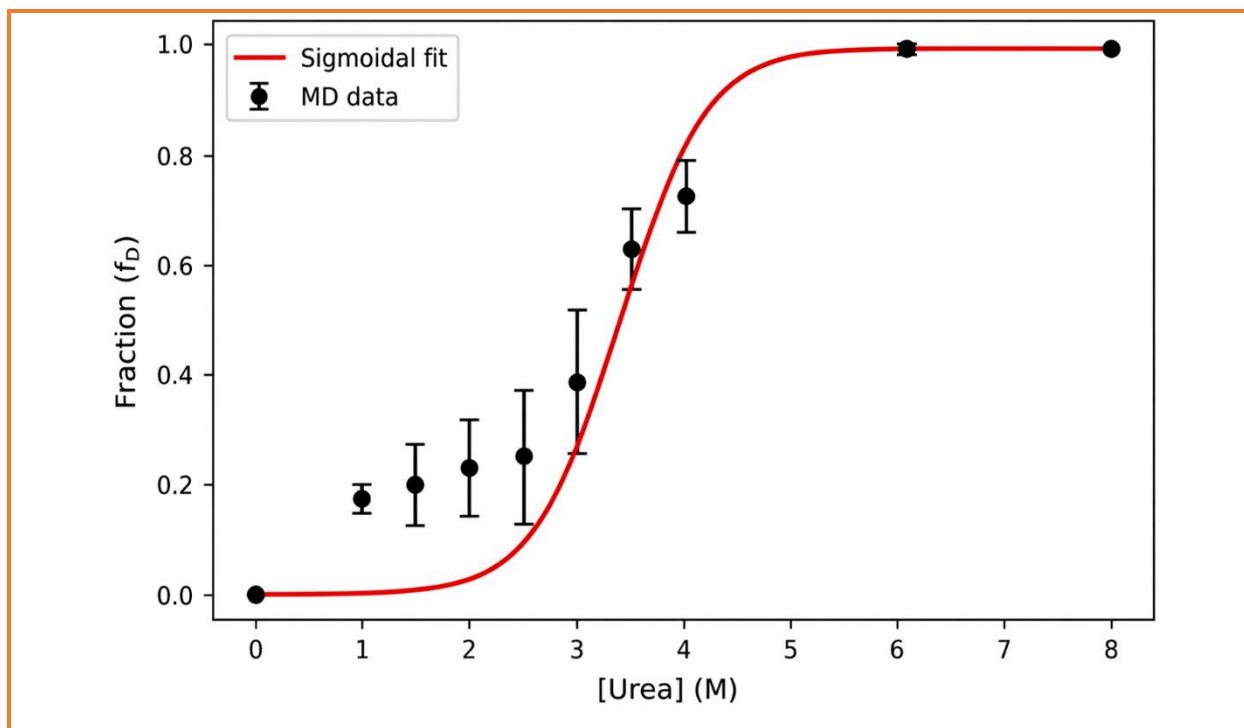

**Figures S4.** Fraction of disrupted RNA population as a function of urea concentration, calculated from RMSD relative to the reference structure, using an RMSD threshold ( $> 10 \text{ \AA}$ ) to distinguish native and disrupted states.

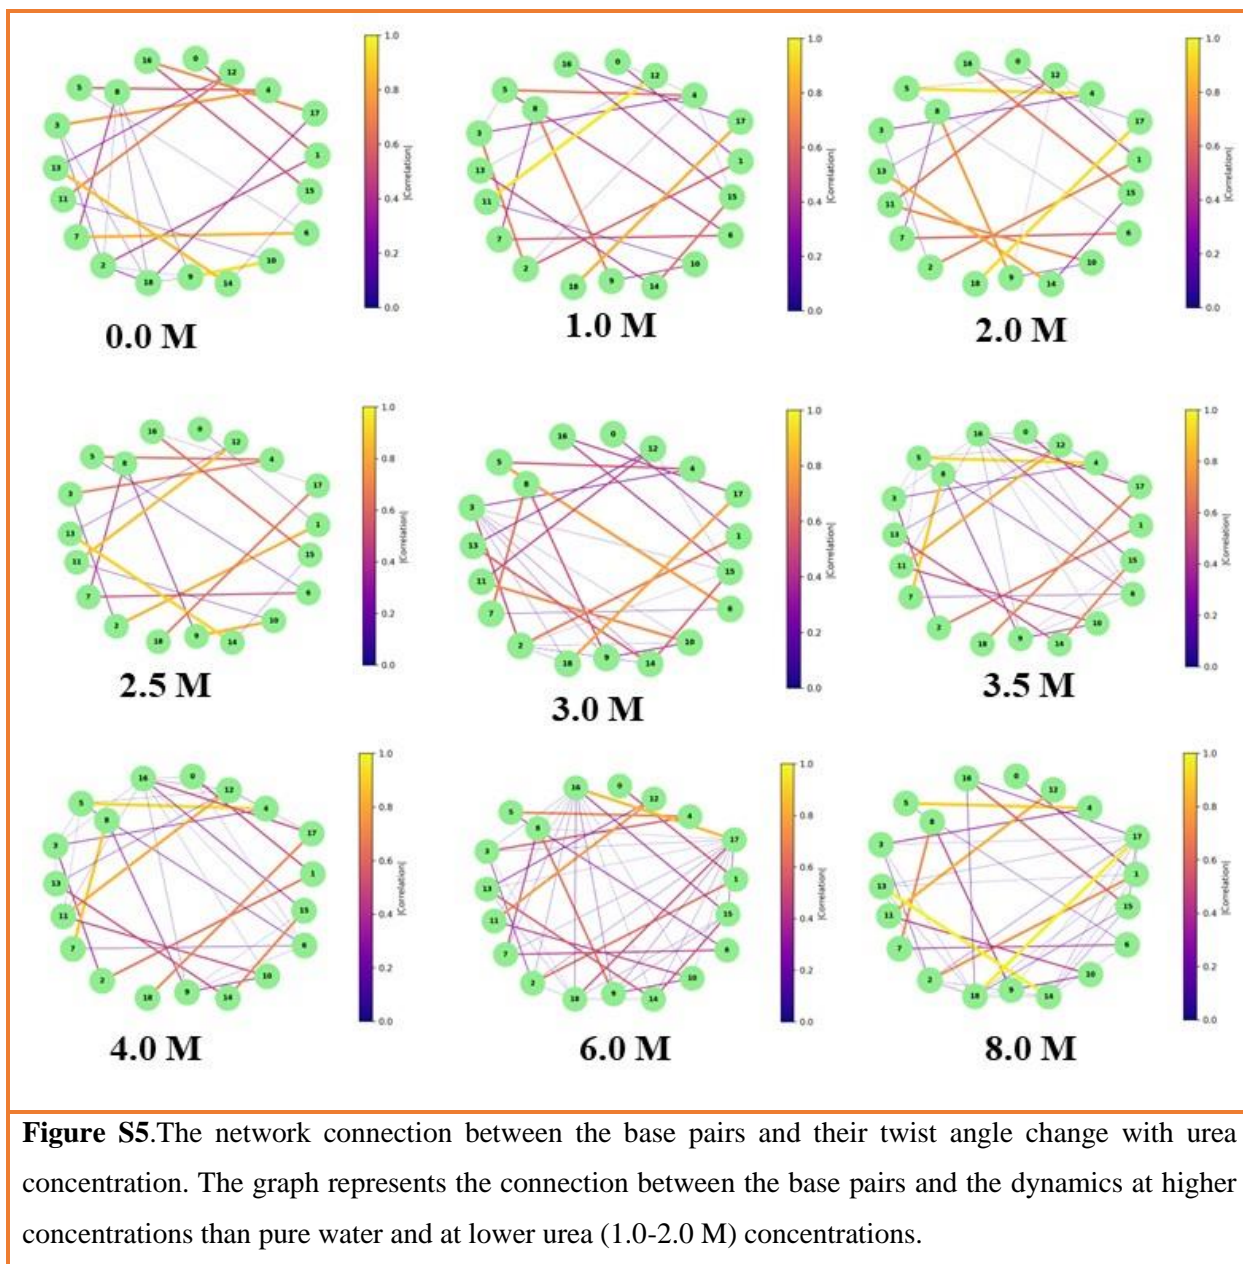

**Figure S5.** The network connection between the base pairs and their twist angle change with urea concentration. The graph represents the connection between the base pairs and the dynamics at higher concentrations than pure water and at lower urea (1.0-2.0 M) concentrations.

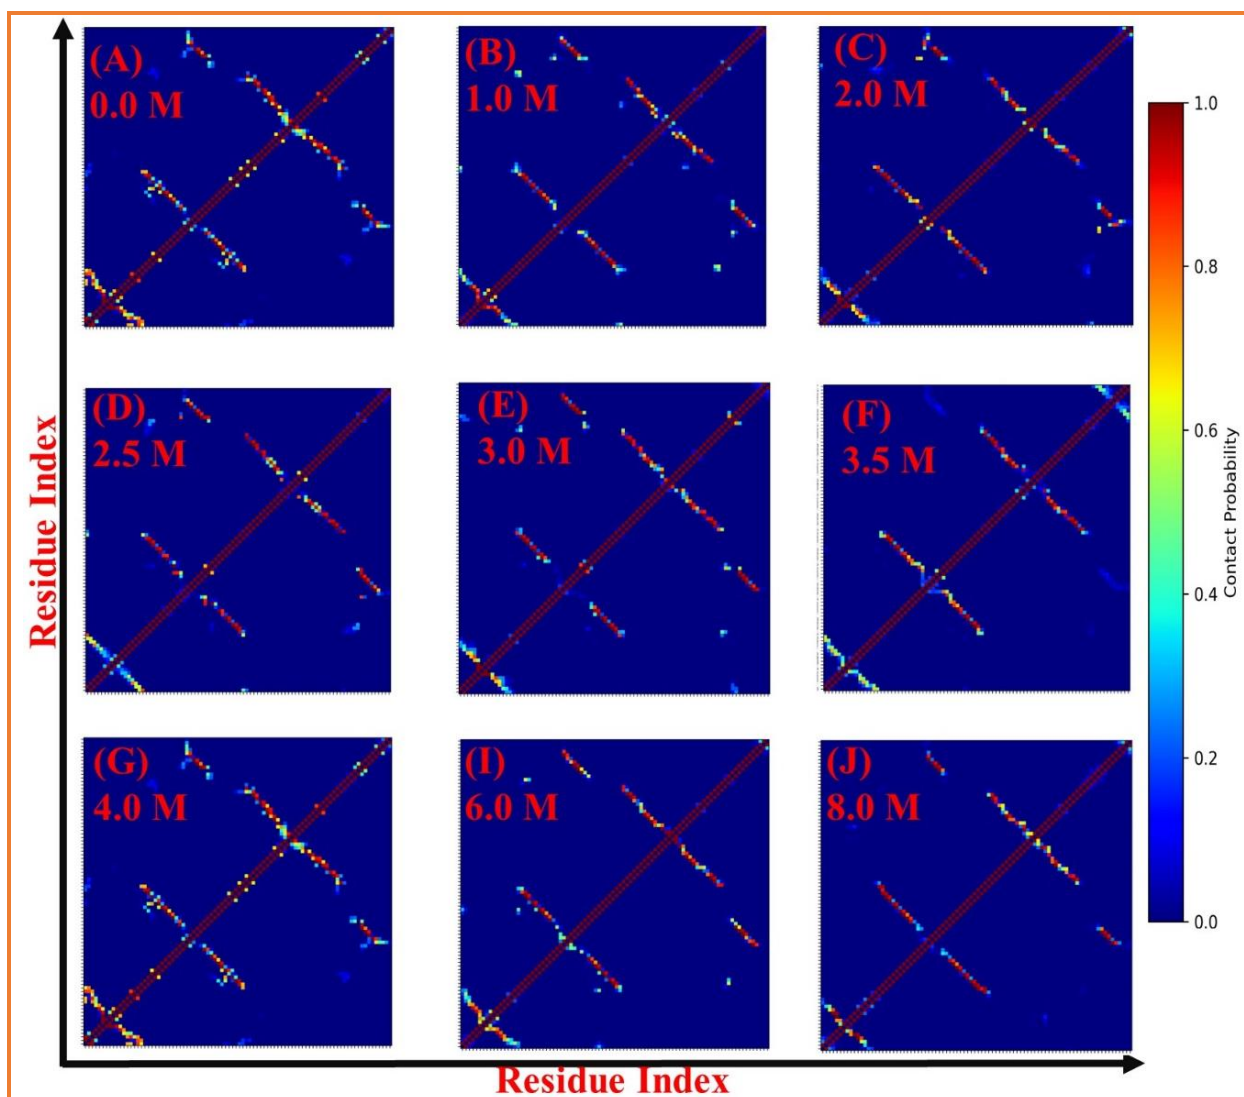

**Figure S6.** The residue-residue contact map in the RNA structure at different urea concentrations. In pure water and lower urea concentration, the bases interact more with a higher contact probability. At higher urea concentration, the residue-residue contact probability reduced, and the number of nucleobases with contact was also less.



Non-WC Parking Probability (Data 2.3.40)

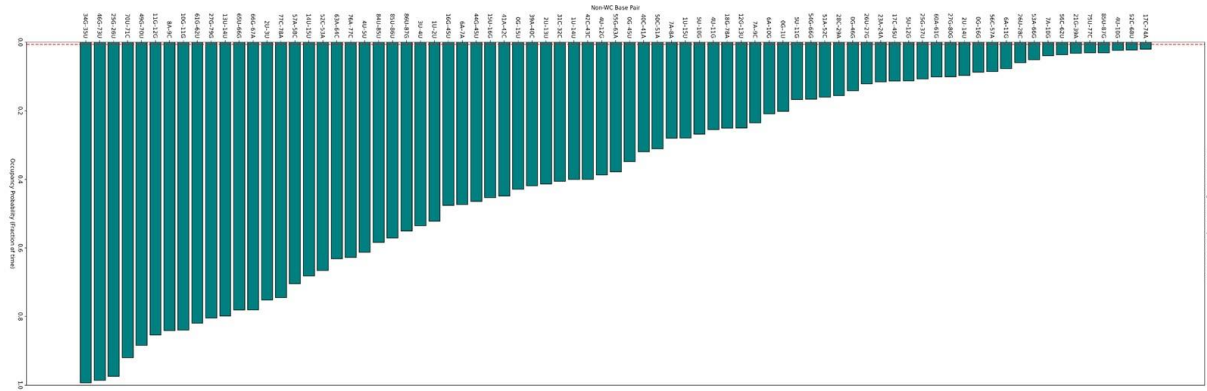

Non-WC Parking Probability (Data 2.3.39)

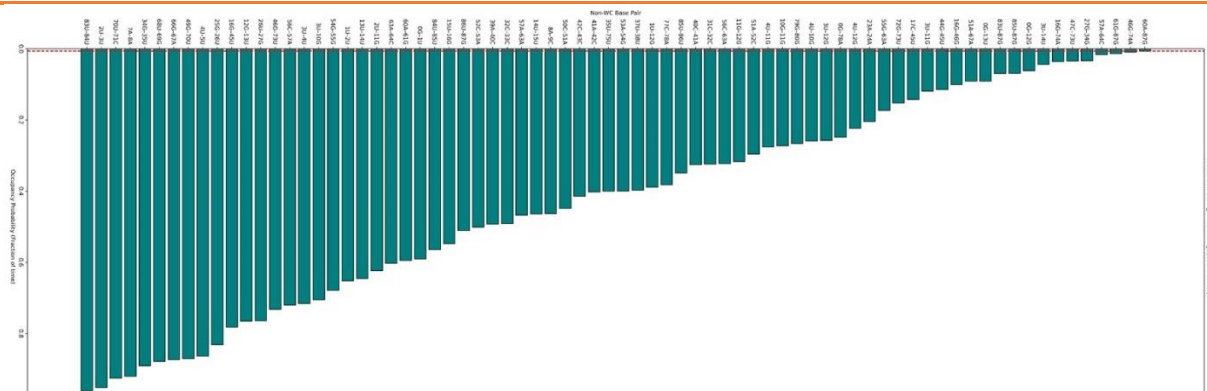

Non-WC Parking Probability (Data 2.3.38)

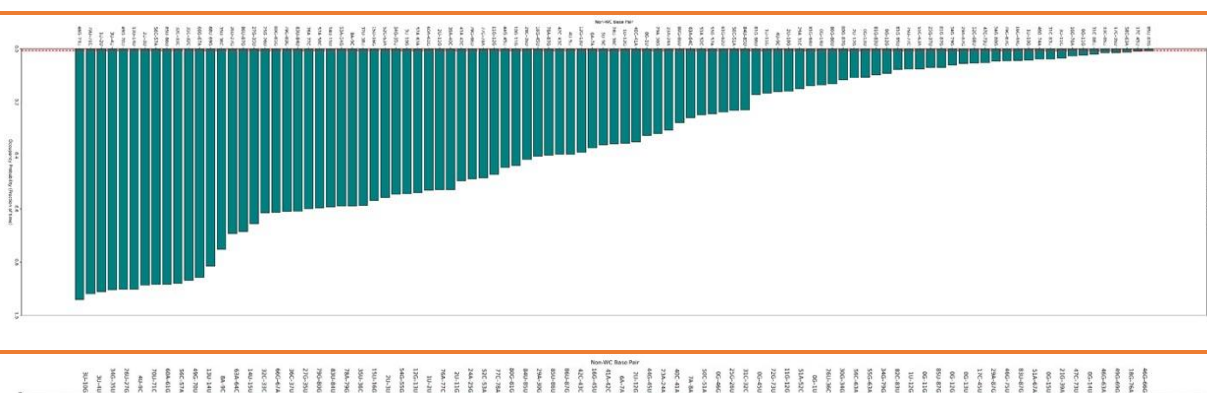

Non-WC Parking Probability (Data 2.3.37)

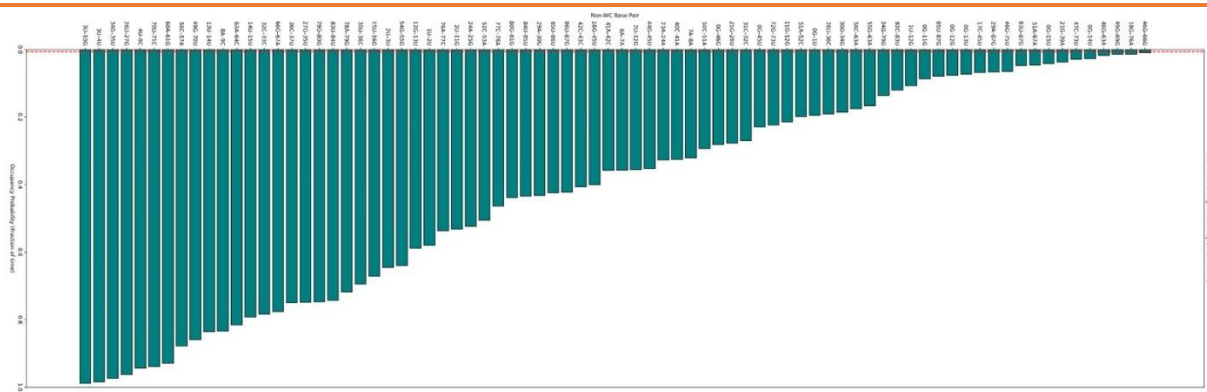



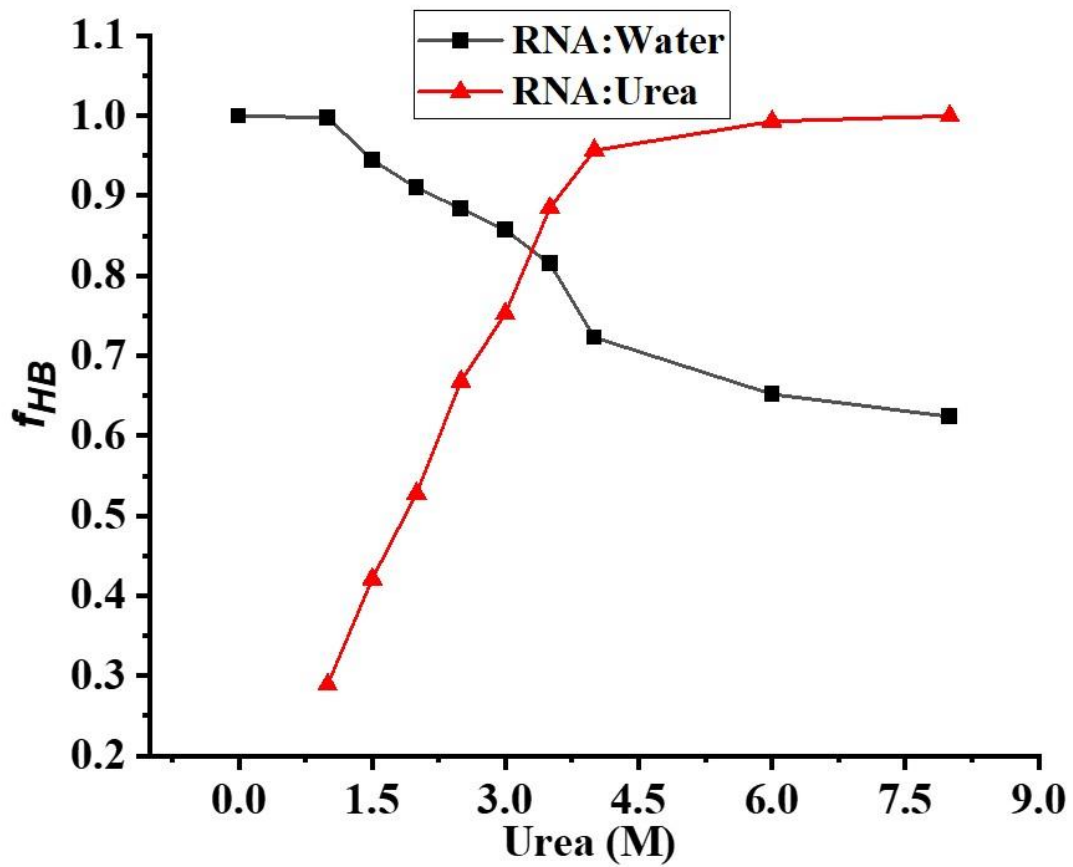

**Figure S8.** The fraction of the hydrogen bond of RNA: Urea and RNA: Water in urea solutions.

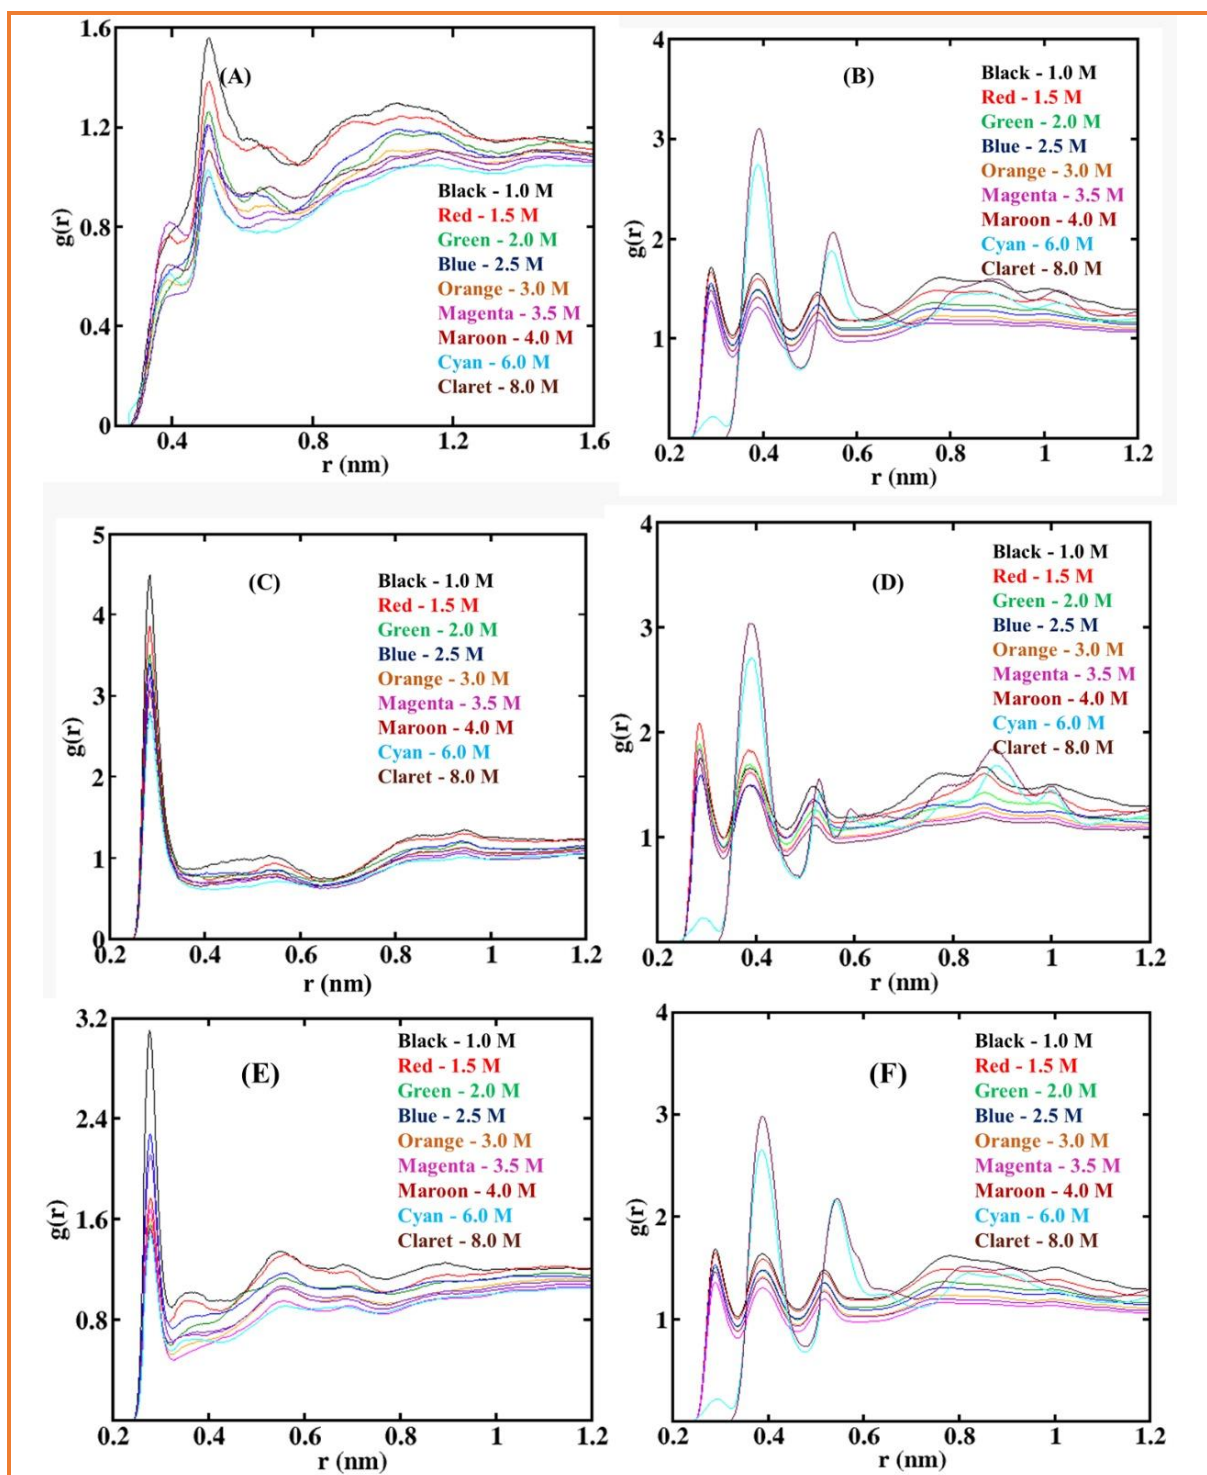

**Figure S9.** RDFs of (A)  $O_U$  around nitrogen of RC (B)  $N_U$  around the phosphate of RC (C)  $O_U$  around nitrogen of RG (D)  $N_U$  around the phosphate of RG (E)  $O_U$  around nitrogen of RU (F)  $N_U$  around the phosphate of RU

### Section 3

#### Tables

**Table S1.** Residue-Residue contact probabilities from a trajectory generated with GROMACS, and the average contact probabilities and  $\Delta C$  values relative to 0. M reference.

| <b>Urea (M)</b> | <b>Avg Contact Prob</b> | <b><math>\Delta C = U_C - 0.0 M</math></b> |
|-----------------|-------------------------|--------------------------------------------|
| 0               | 0.64                    | 0                                          |
| 1               | 0.52                    | - 0.12                                     |
| 2               | 0.37                    | - 0.27                                     |
| 2.5             | 0.32                    | - 0.32                                     |
| 3               | 0.34                    | - 0.30                                     |
| 3.5             | 0.25                    | - 0.39                                     |
| 4               | 0.26                    | - 0.38                                     |
| 6               | 0.23                    | - 0.41                                     |
| 8               | 0.19                    | - 0.45                                     |

**Table S2.** The number of base pairs and the lifetime of these Base pairs in (ps)

| 0.0 M               | 1.0 M               | 1.5 M              | 2.0 M              | 2.5 M               | 3.0 M              | 3.5 M               | 4.0 M               | 6.0 M               | 8.0 M              |
|---------------------|---------------------|--------------------|--------------------|---------------------|--------------------|---------------------|---------------------|---------------------|--------------------|
| 52C-66G =<br>3299.3 | 52C-66G<br>=2571.4  | 52C-66G<br>=3563.6 | 52C-66G<br>=769.4  | 52C-66G<br>=1751.4  | 52C-66G<br>=2556.8 | 52C-66G =<br>1527.2 | 52C-<br>66G=1258.3  | 52C-<br>66G=2532.8  | 52C-<br>66G=1068.1 |
| 50C-69G<br>=13455   | 50C-69G<br>=7597.4  | 50C-69G<br>=2980.7 | 50C-69G<br>=1143.9 | 50C-69G<br>=7376.2  | 50C-69G<br>=5376.4 | 50C-69G=<br>4863.2  | 50C-<br>69G=7987.   | 50C-<br>69G=1863.5  | 50C-<br>69G=1364.4 |
| 25G-36C<br>=12447.5 | 25G-36C<br>=1807.7  | 25G-36C<br>=7826.3 | 25G-36C<br>=5655.3 | 25G-36C<br>=10291.4 | 25G-36C<br>=1150   | 25G-36C=<br>515.8   | 25G-<br>36C=12412.5 | 25G-<br>36C=1618    | 25G-<br>36C=1618   |
| 48G-71C<br>=10922.7 | 48G-71C<br>=9946.7  | 48G-71C<br>=3386.8 | 48G-71C<br>=4703.2 | 48G-71C<br>=6320.2  | 48G-71C<br>=6454.3 | 48G-<br>71C=5009.3  | 48G-<br>71C=3130.3  | 48G-<br>71C=2014.2  | 48G-<br>71C=1871.3 |
| 54G-64C<br>=9824    | 54G-64C<br>=10679.6 | 54G-64C<br>=5582.1 | 54G-64C<br>=6141.3 | 54G-64C<br>=5809.8  | 54G-64C<br>=2806.7 | 54G-<br>64C=4189    | 54G-<br>64C=7143.6  | 54G-<br>64C=1690.2  | 54G-<br>64C=83.3   |
| 32C-80G<br>=5898.8  | 32C-80G<br>=27227.3 | 32C-80G<br>=9328.1 | 32C-80G<br>=29960  | 32C-80G<br>=7060.7  | 32C-80G<br>=14955  | 32C-<br>80G=8350    | 32C-<br>80G=9498.3  | 32C-<br>80G=17814.3 | 32C-<br>80G=24960  |
| 31C-81G<br>=7085.7  | 31C-81G<br>=3922    | 31C-81G<br>=8517.1 | 31C-81G<br>=1135.5 | 31C-81G<br>=5028.8  | 31C-81G<br>=4668   | 31C-<br>81G=6750    | 31C-<br>81G=5297.3  | 31C-<br>81G=567.6   | 31C-<br>81G=1026.8 |
| 30G-82C<br>=3029    | 30G-82C<br>=4618.2  | 30G-82C<br>=7420   | 30G-82C<br>=3416.7 | 30G-82C<br>=23030.8 | 30G-82C<br>=4225   | 30G-<br>82C=1975    | 30G-<br>82C=11952   | 30G-<br>82C=1676.5  | 30G-<br>82C=4219   |
| 19G-42C<br>=3731.5  | 19G-42C<br>=3327.8  | 19G-42C<br>=3732.1 | 19G-42C<br>=2890.6 | 19G-42C<br>=5591.3  | 19G-42C<br>=6317   | 19G-<br>42C=10281   | 19G-<br>42C=5514.2  | 19G-<br>42C=4037.7  | 19G-<br>42C=8011.3 |
| 33C-79G<br>=6587.2  | 33C-79G<br>=2499.2  | 33C-79G<br>=1993.3 | 33C-79G<br>=2722.7 | 33C-79G<br>=2827.7  | 33C-79G<br>=2300.0 | 33C-<br>79G=310     | 33C-<br>79G=106.2   | 33C-<br>79G=1759.9  | 33C-<br>79G=1313.2 |
| 21G-40C<br>=7383.4  | 21G-40C<br>=2883.5  | 21G-40C<br>=3527.4 | 21G-40C<br>=2946   | 21G-40C<br>=1511.4  | 21G-<br>40C=1101.9 | 21G-<br>40C=1094.8  | 21G-<br>40C=3461.6  | 21G-<br>40C=1012.7  | 21G-<br>40C=1082.5 |
| 18G-43C<br>=8294.4  | 18G-43C<br>=7350    | 18G-43C<br>=3932   | 18G-43C<br>=5726.3 | 18G-43C<br>=1227.3  | 18G-43C<br>=9028.8 | 18G-<br>43C=1929.2  | 18G-<br>43C=3791    | 18G-<br>43C=1316.7  | 18G-<br>43C=1389.5 |
| 24A-37U<br>=899.6   | 24A-37U<br>=449.1   | 24A-37U<br>=477    | 24A-37U<br>=410.8  | 24A-37U<br>=500     | 24A-37U<br>=494.6  | 24A-<br>37U=366.2   | 24A-<br>37U=572.5   | 24A-<br>37U=555.2   | 24A-<br>37U=455.7  |
| 23A-38U<br>=558.7   | 23A-38U<br>=434.8   | 23A-38U<br>=614.3  | 23A-38U<br>=707.5  | 23A-38U<br>=221.3   | 23A-38U<br>=445.8  | 23A-<br>38U=495.3   | 23A-<br>38U=728.5   | 23A-<br>38U=639.7   | 23A-<br>38U=653.4  |
| 22U-39A<br>=182.2   | 22U-39A<br>=246.5   | 22U-39A<br>=334.8  | 22U-39A<br>=279.4  | 22U-39A<br>=230.7   | 22U-39A<br>=167.5  | 22U-<br>39A=245.8   | 22U-<br>39A=317.1   | 22U-<br>39A=384.1   | 22U-<br>39A=268.4  |
| 17C-44G<br>=231     | 17C-44G<br>=696.4   | 17C-44G<br>=945.8  | 17C-44G<br>=1204   | 17C-44G<br>=1636    | 17C-44G<br>=1926.8 | 17C-<br>44G=307.3   | 17C-<br>44G=1266.8  | 17C-<br>44G=181.9   | 17C-<br>44G=1286.5 |
| 29A-83U<br>=753.7   | 29A-83U<br>=869.7   | 29A-83U<br>=531.8  | 29A-83U<br>=1261.9 | 29A-83U<br>=634.3   | 29A-83U<br>=69.2   | 29A-<br>83U=266.7   | 29A-<br>83U=714.7   | 29A-<br>83U=176.1   | 29A-<br>83U=190    |
| 75U-76A<br>=78.8    | 75U-76A<br>=73.6    | 75U-76A<br>=69.8   | 75U-76A<br>=67.7   | 75U-76A<br>=83.1    | 75U-76A<br>=80.4   | 75U-<br>76A=71.6    | 75U-76A=75          | 75U-<br>76A=50      | 75U-<br>76A=71.1   |
| 17C-18G<br>=71.5    | 17C-18G<br>=62      | 17C-18G<br>=68.5   | 17C-18G<br>=60.9   | 17C-18G<br>=65.1    | 17C-18G<br>=64.9   | 17C-<br>18G=64.3    | 17C-<br>18G=63.9    | 17C-<br>18G=0       | 17C-<br>18G=58.6   |
| 74A-75U<br>=875.3   | 74A-75U<br>=269     | 74A-75U<br>=65.6   | 74A-75U<br>=71.6   | 74A-75U<br>=72.4    | 74A-75U<br>=75.2   | 74A-<br>75U=73.2    | 74A-<br>75U=70.6    | 74A-<br>75U=68.9    | 74A-<br>75U=72.3   |
| 51A-68U<br>=977.7   | 51A-68U<br>=119.3   | 51A-68U<br>=135.8  | 51A-68U<br>=155.8  | 51A-68U<br>=204.4   | 51A-68U<br>=141.5  | 51A-<br>68U=136.4   | 51A-<br>68U=183     | 51A-<br>68U=97.7    | 51A-<br>68U=139.8  |
| 16G-17C<br>=1106.6  | 16G-17C<br>=65.8    | 16G-17C<br>=68.7   | 16G-17C<br>=58.8   | 16G-17C<br>=74.3    | 16G-17C<br>=63.7   | 16G-<br>17C=84.4    | 16G-<br>17C=66.1    | 16G-<br>17C=74.8    | 16G-<br>17C=98.6   |

## Section 4

### CHARMM36 ff: Results

#### Set-II

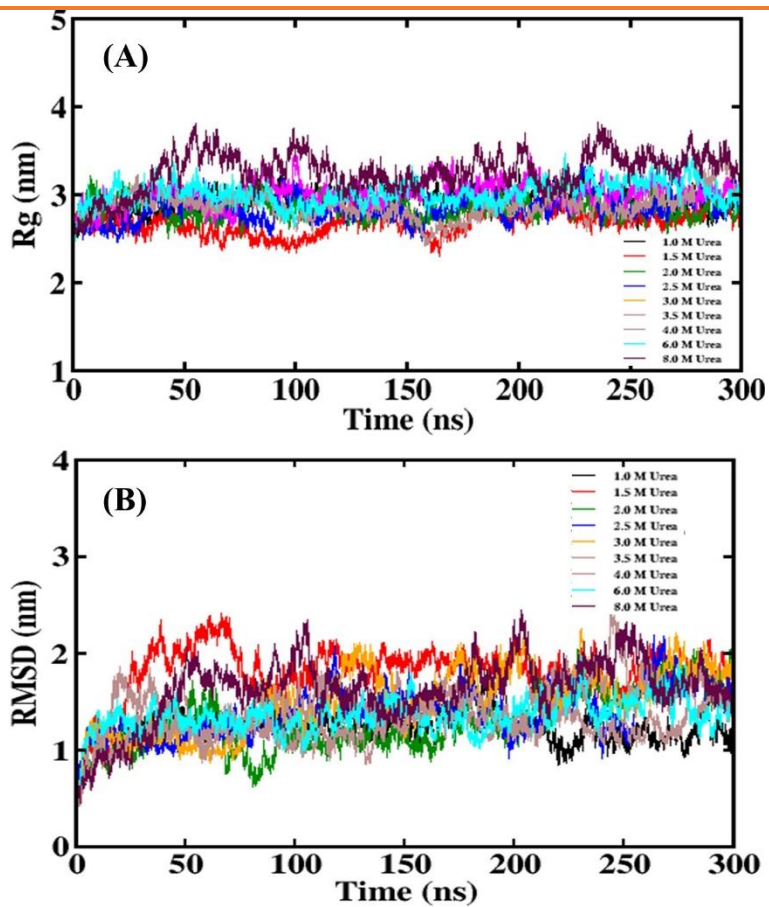

**Figure S10.** (A) Radius of gyration (Rg) and (B) root mean square deviation (RMSD) time evaluation graph.

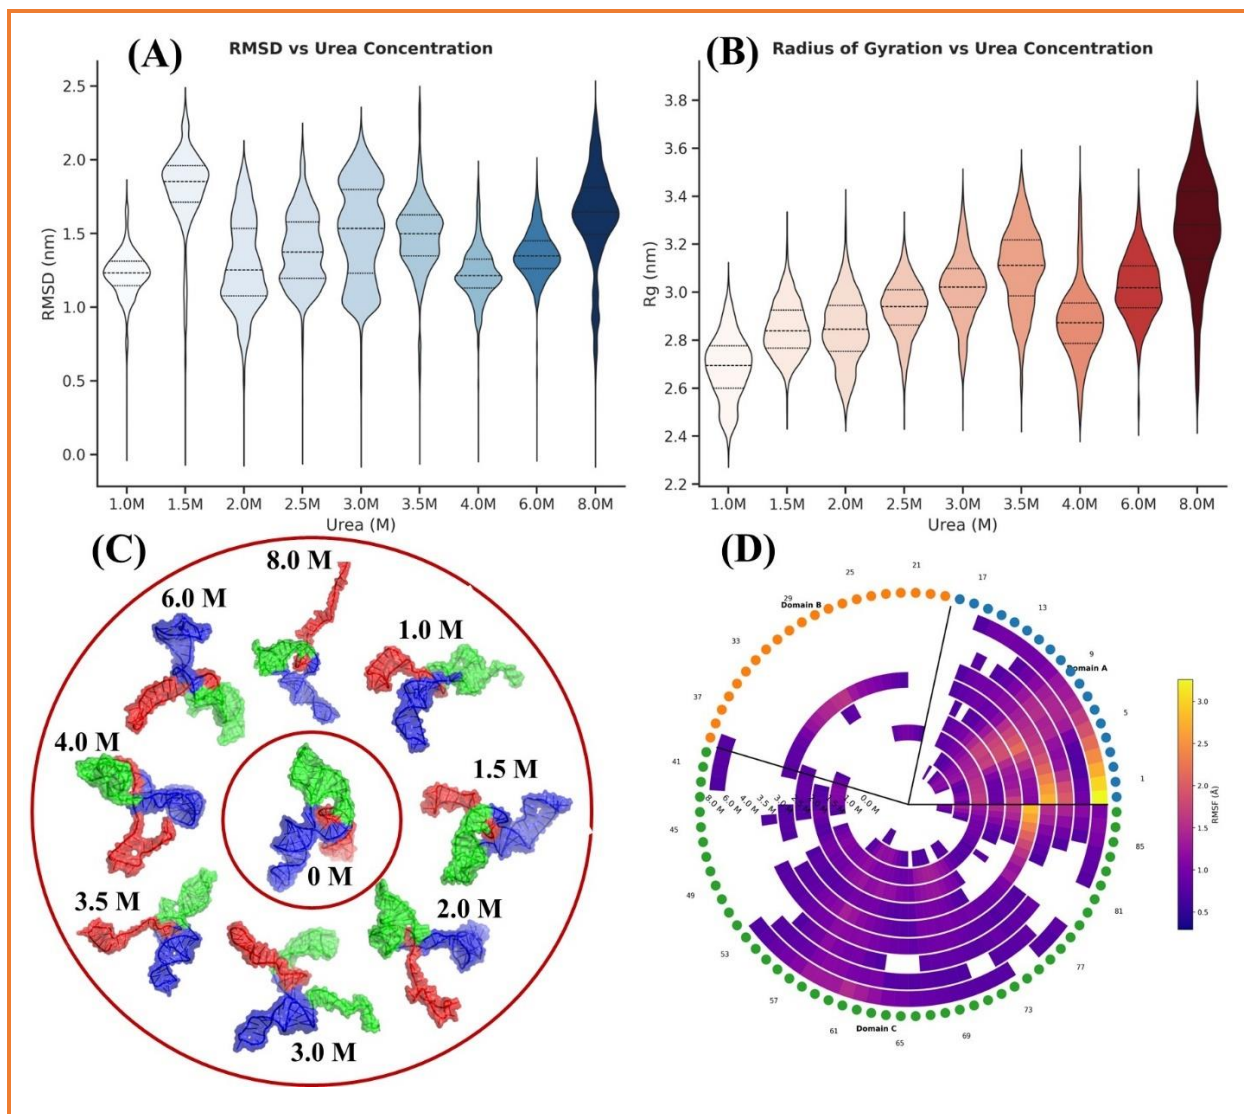

**Figure S11.** The upper panel presents violin distribution plots of the (A) root-mean-square deviation (RMSD) and (B) radius of gyration (Rg) of the RNA as a function of urea concentration (0–8 M). The violin distribution represents the central tendency and the full conformational distribution sampled during the simulations. (C–D) In the lower panel, the maximum fluctuation is evaluated across all concentrations, and the circular heat map shows the root mean square fluctuation (RMSF) of RNA structure. The residue that has less than 0.4 nm RMSF magnitude is not included in the heatmap (White), and the residues with higher RMSF values are encoded using a continuous color gradient.

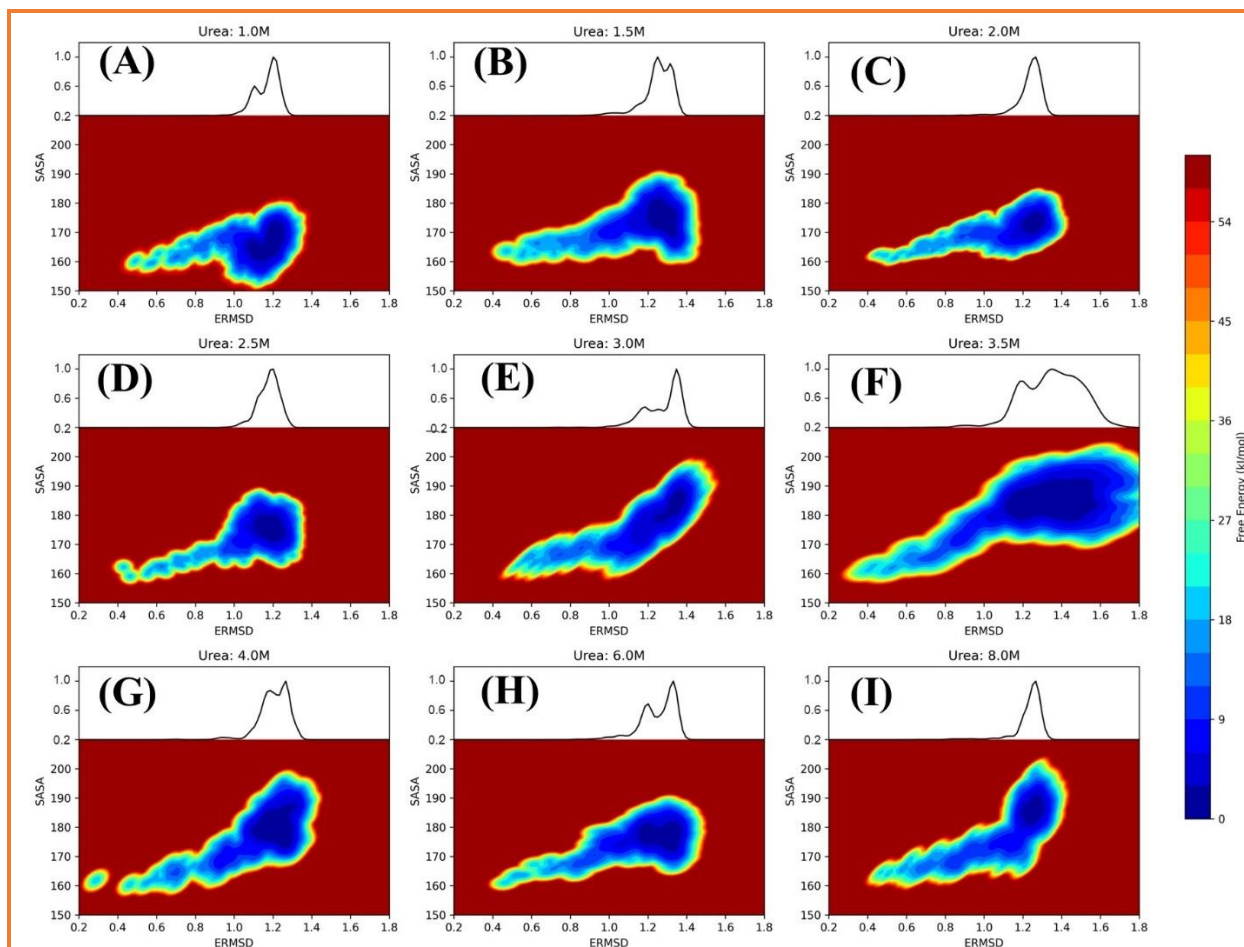

**Figure S12.** The two-dimensional free-energy surfaces projected onto the ensemble RMSD (eRMSD) and solvent-accessible surface area (SASA) coordinates at increasing urea concentrations.

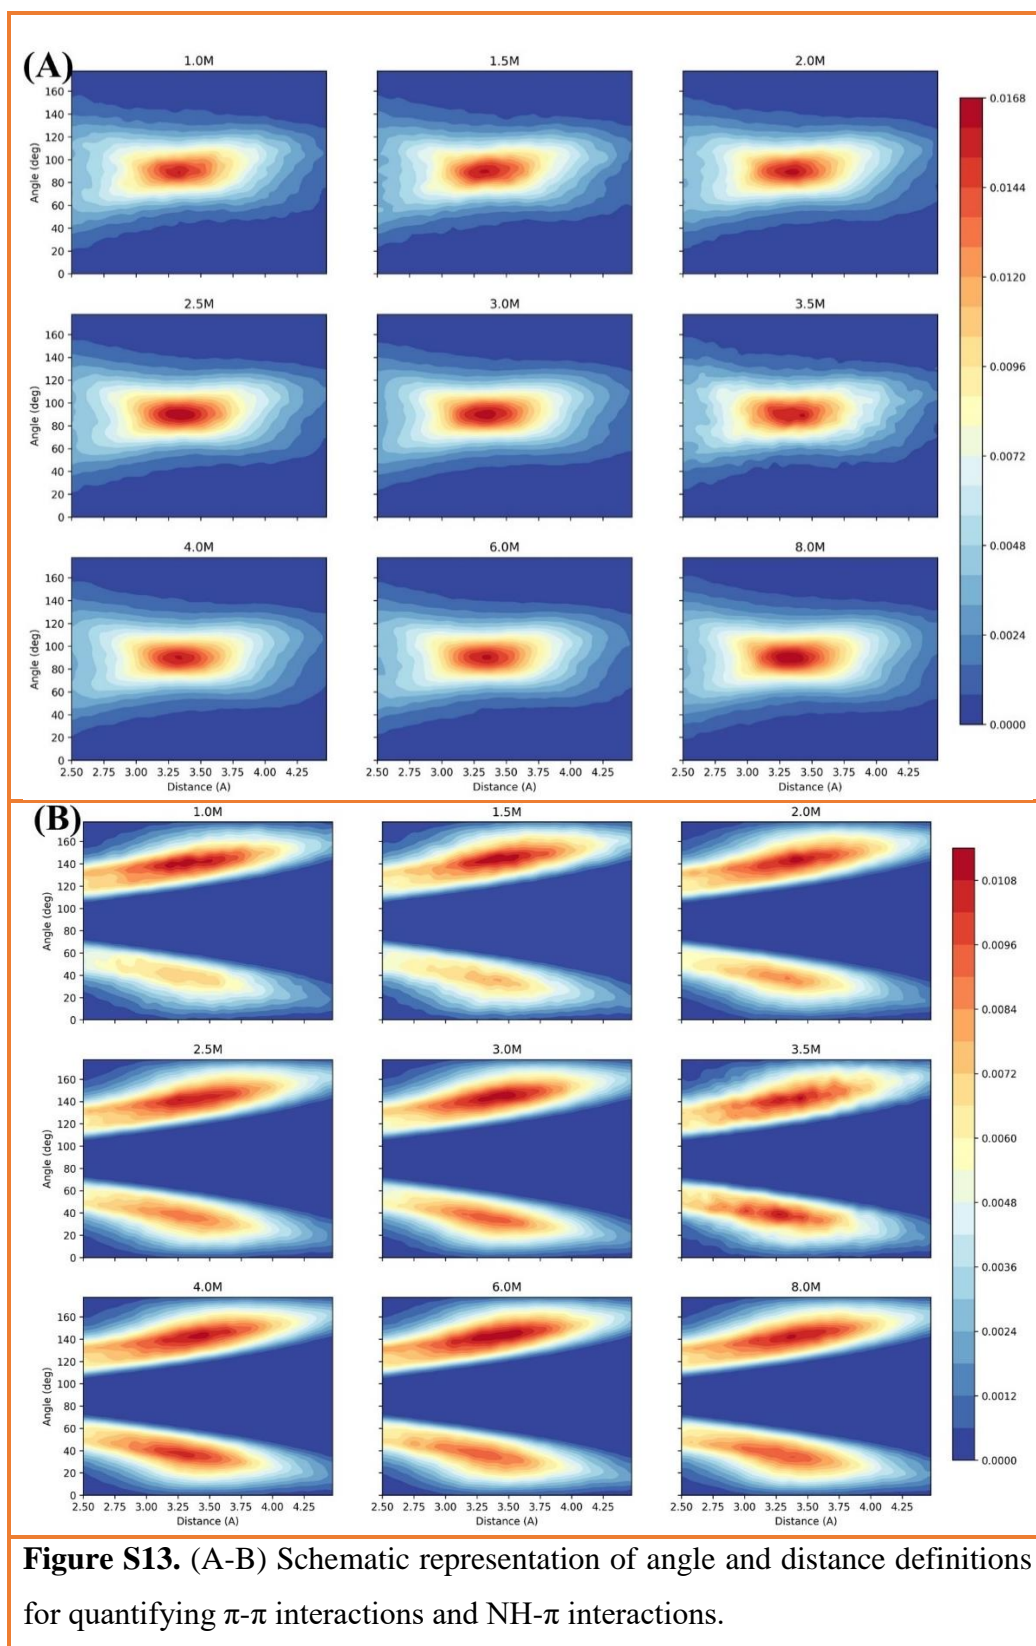

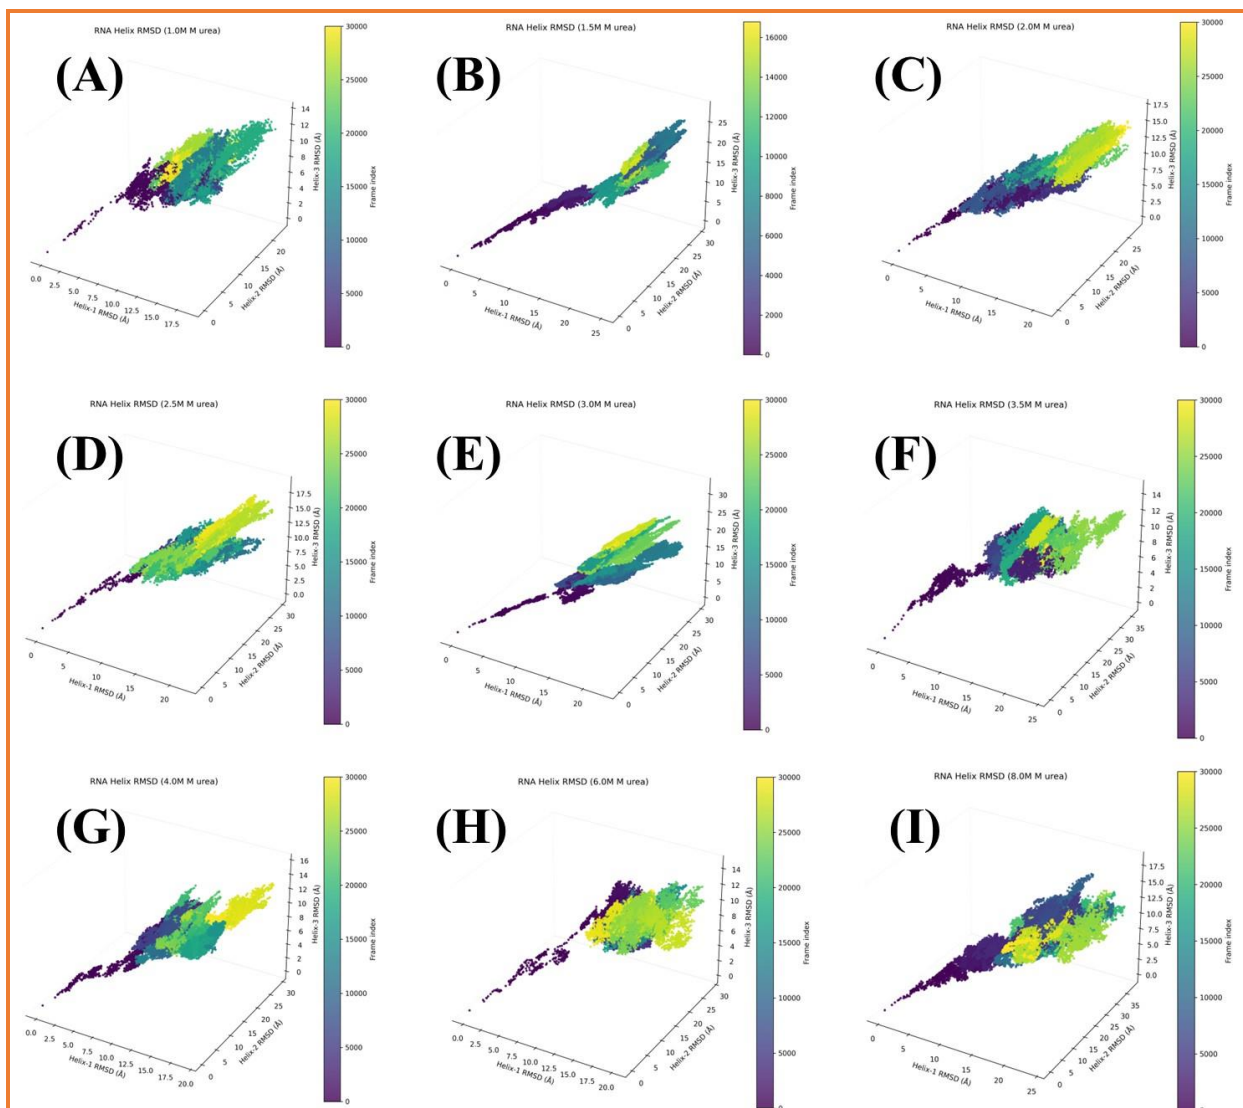

**Figure S14.** 3D plot illustrates the three-dimensional RMSD distributions of individual helical segments as a function of urea concentration. The color bar represents the time frame, and based on that, characterized by low and higher RMSD values across all helices, indicating the conformational topology. The cartoon surface structure represents the max helical RMSD fluctuation from the reference structure.

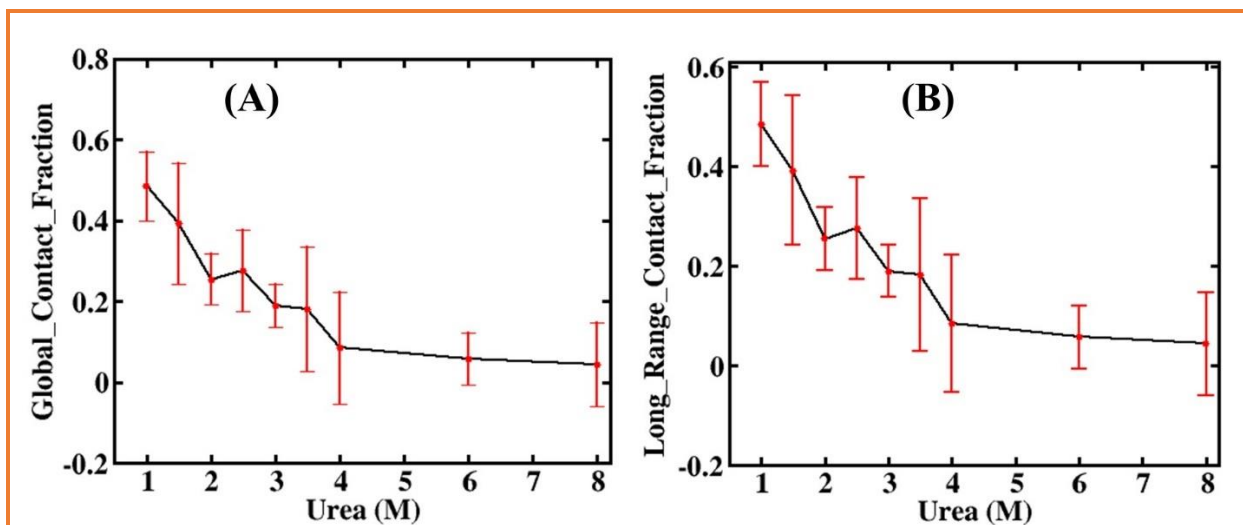

**Figure S15.** (A) shows the global contact order (GOC) and (B) Long-range fraction to distinguish unfolded conformers.

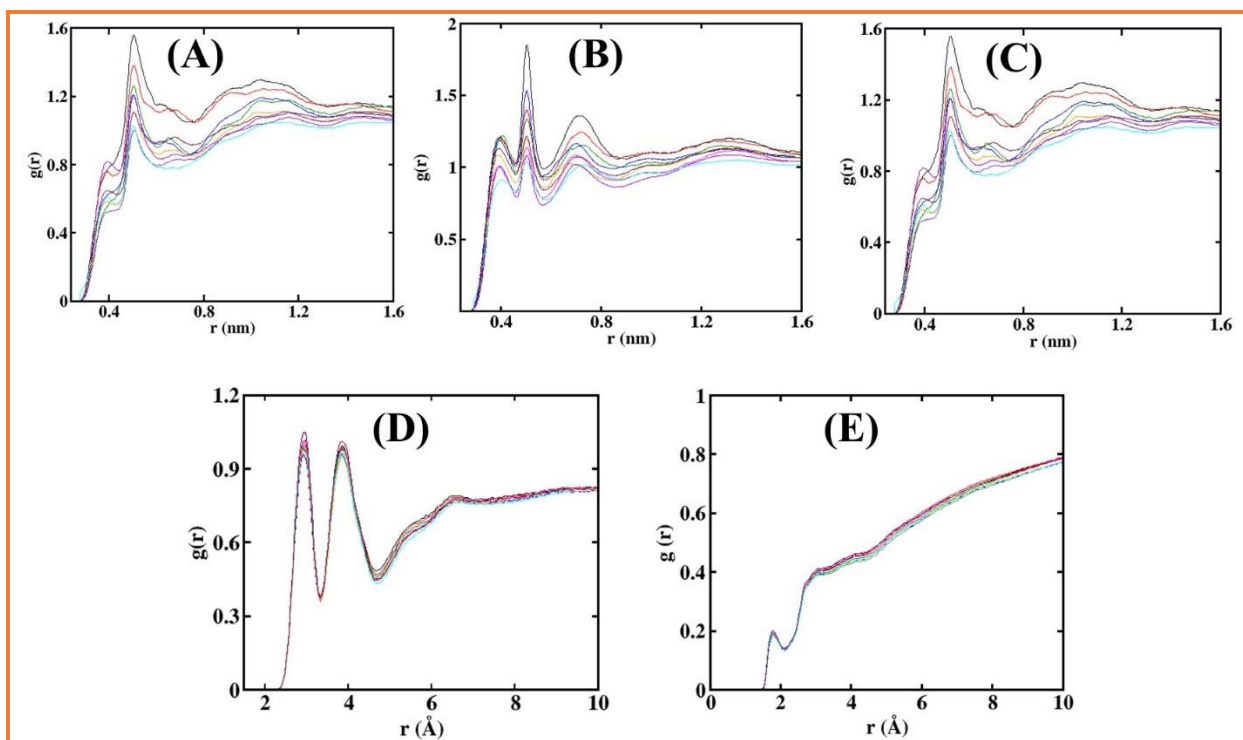

**Figure S16.** (A-E) The radial distribution function  $g(r)$  of urea with nucleobase in (1.0-8.0 M) concentration of urea

## Section 5

### AMBER99SB-ILDN ff: Results

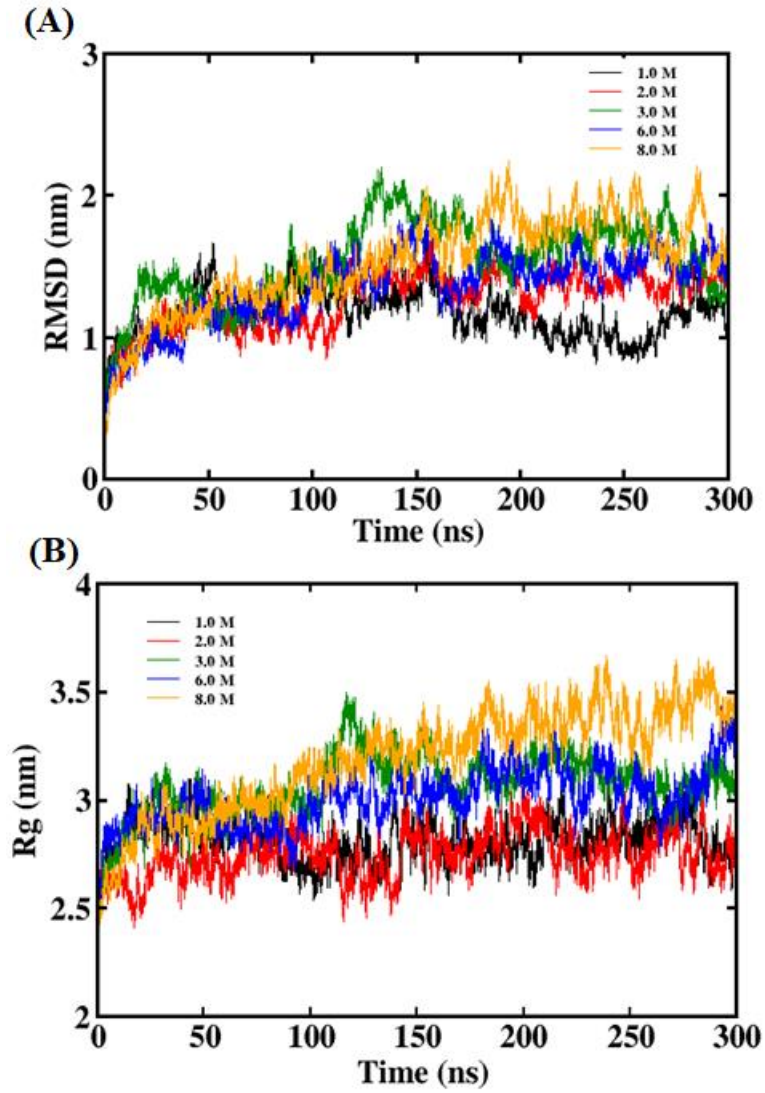

**Figure S17.** (A) Radius of gyration (Rg) and (B) root mean square deviation (RMSD) time evaluation graph.

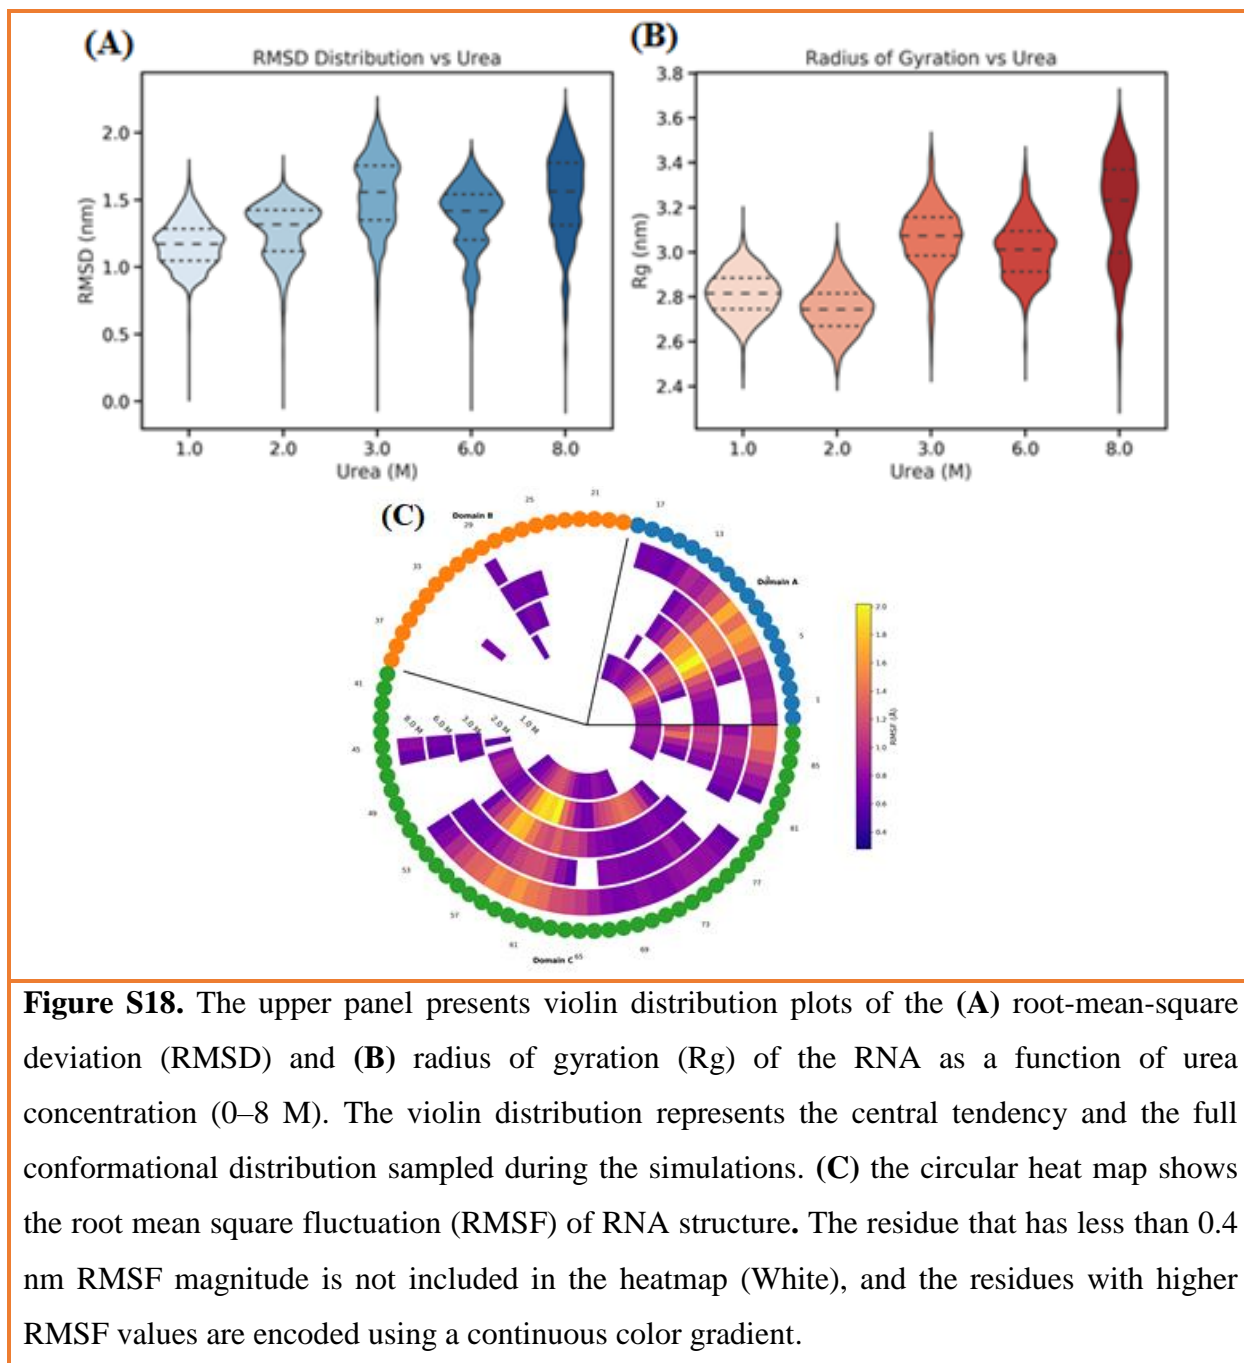

**Figure S18.** The upper panel presents violin distribution plots of the **(A)** root-mean-square deviation (RMSD) and **(B)** radius of gyration (Rg) of the RNA as a function of urea concentration (0–8 M). The violin distribution represents the central tendency and the full conformational distribution sampled during the simulations. **(C)** the circular heat map shows the root mean square fluctuation (RMSF) of RNA structure. The residue that has less than 0.4 nm RMSF magnitude is not included in the heatmap (White), and the residues with higher RMSF values are encoded using a continuous color gradient.

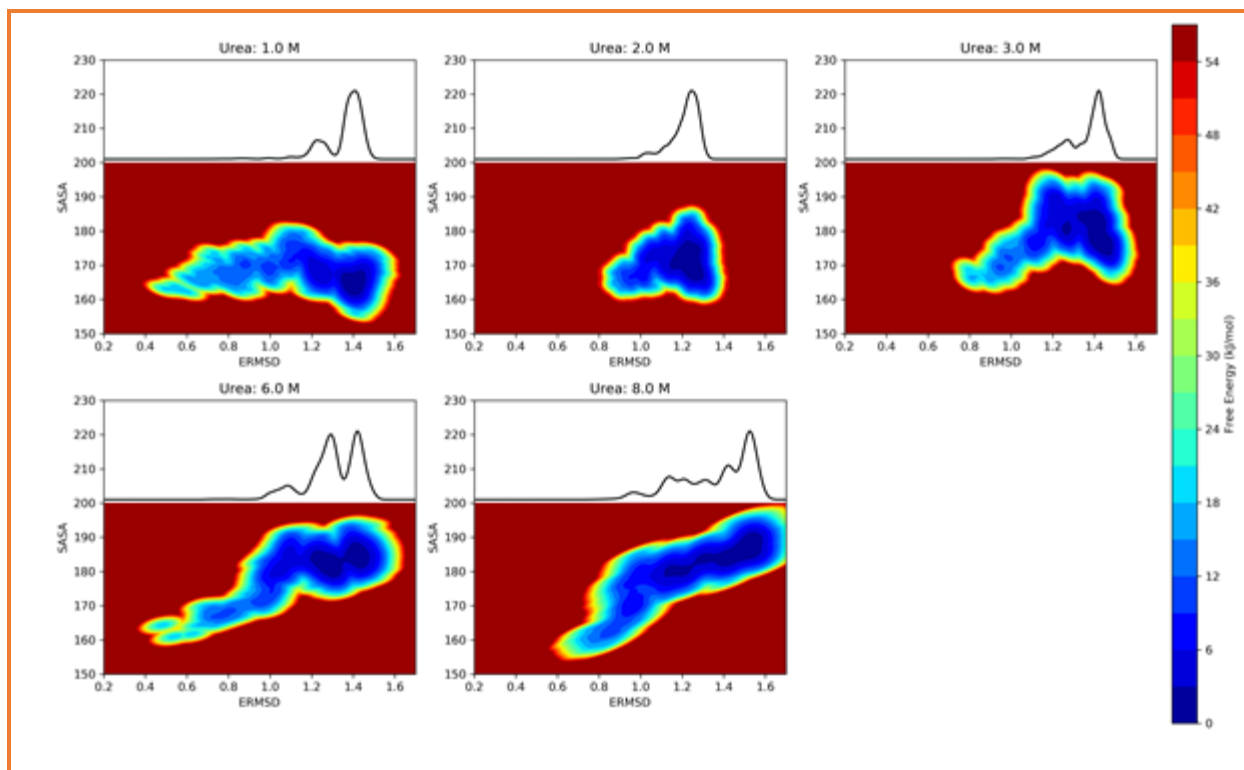

**Figure S19.** The two-dimensional free-energy surfaces projected onto the ensemble RMSD (eRMSD) and solvent-accessible surface area (SASA) coordinates at increasing urea concentrations.

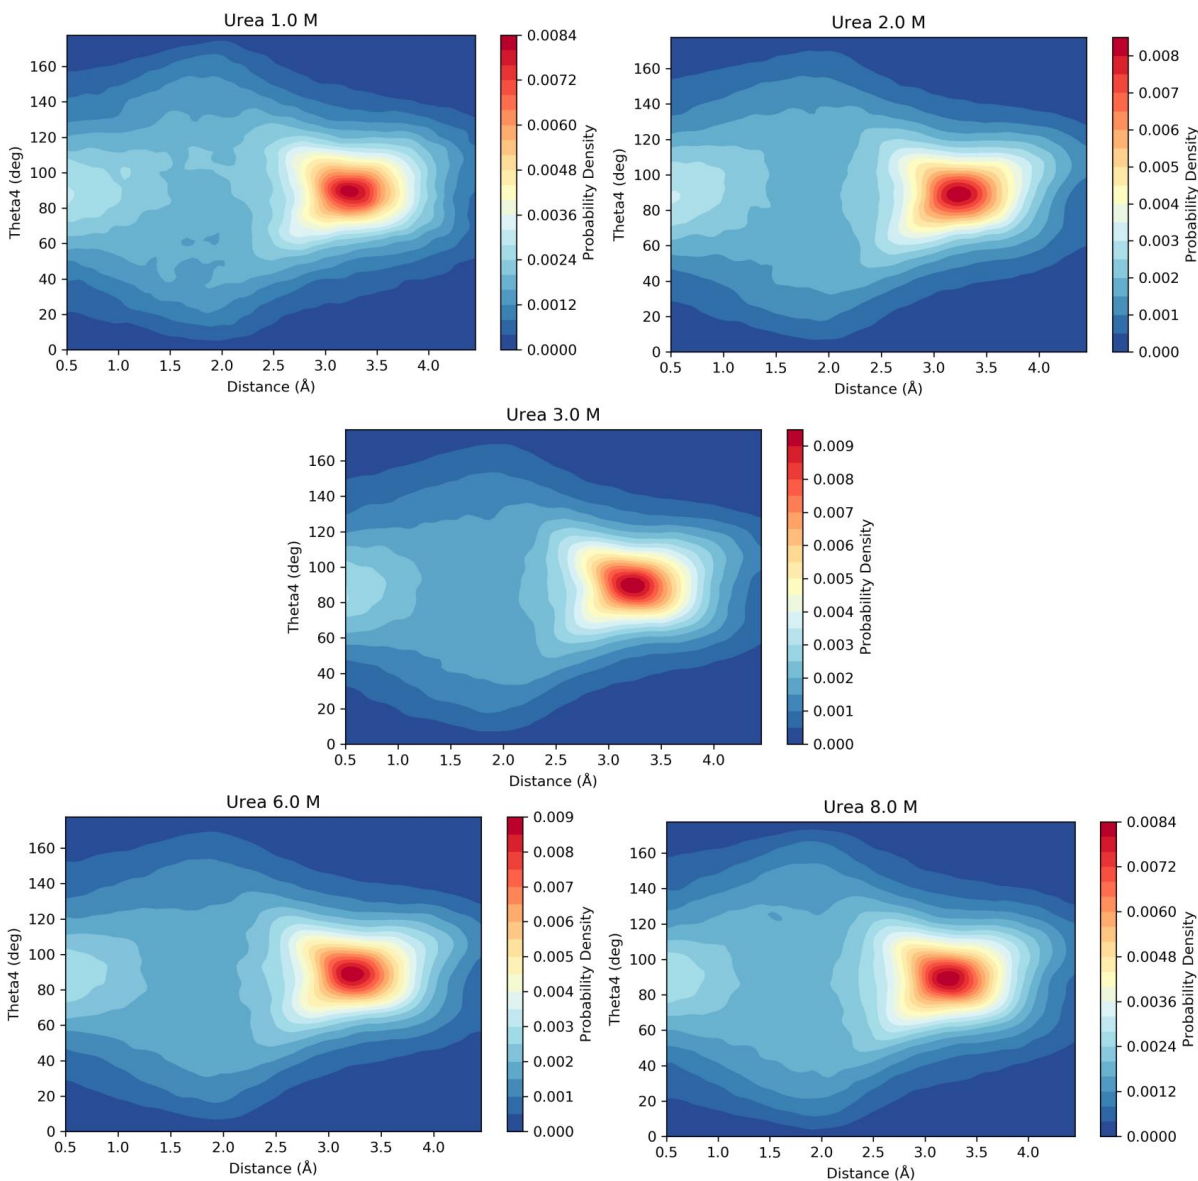

**Figure S20.** Schematic representation of angle and distance definitions for quantifying  $\pi$ - $\pi$  interactions

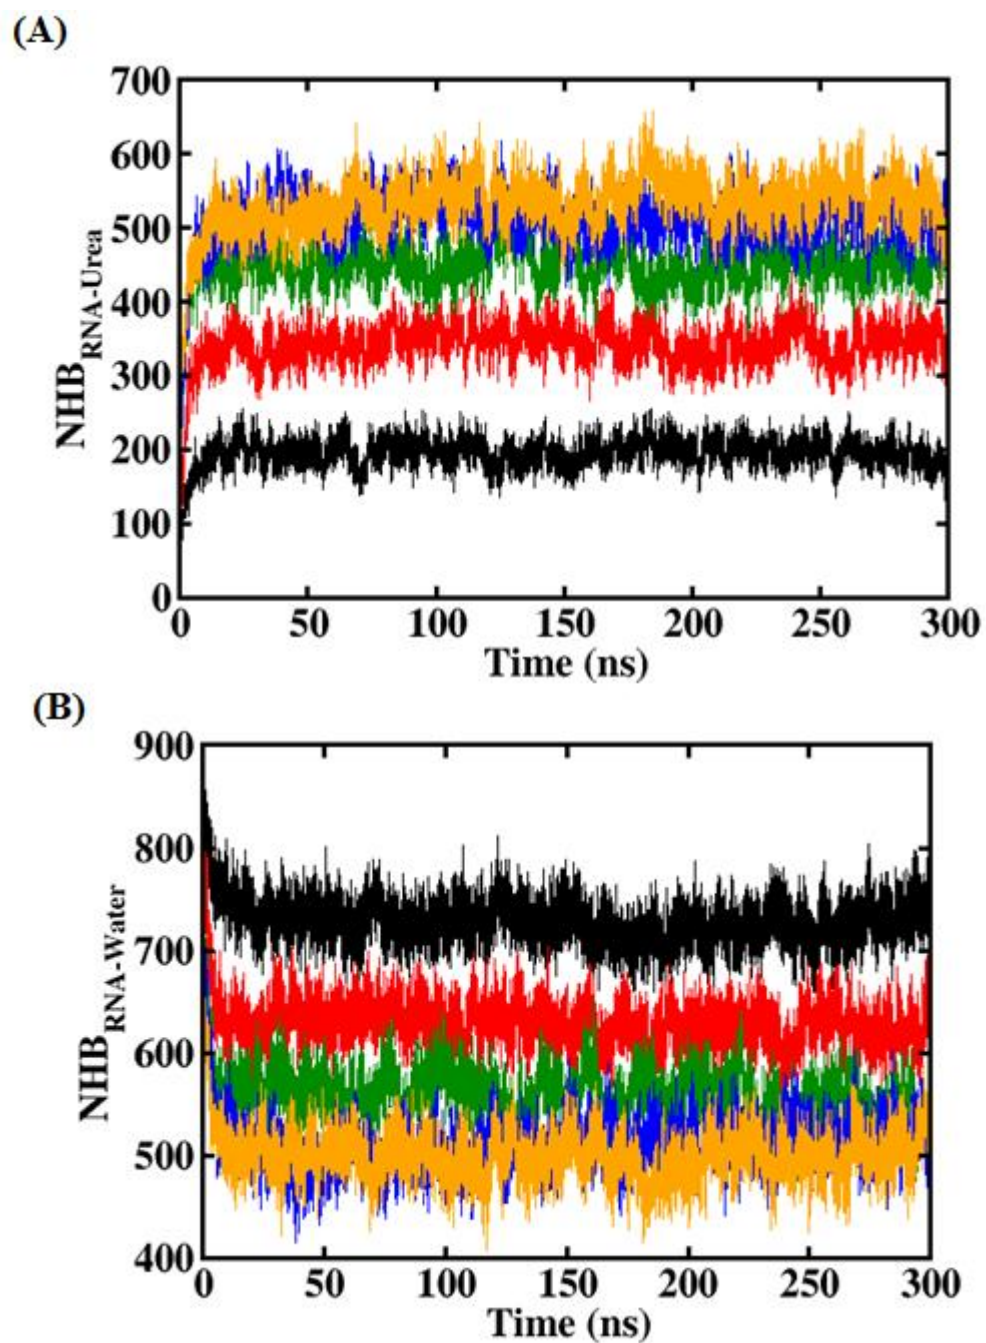

**Figure S21.** Hydrogen bond evolution (A) RNA- Urea (B) RNA- Water

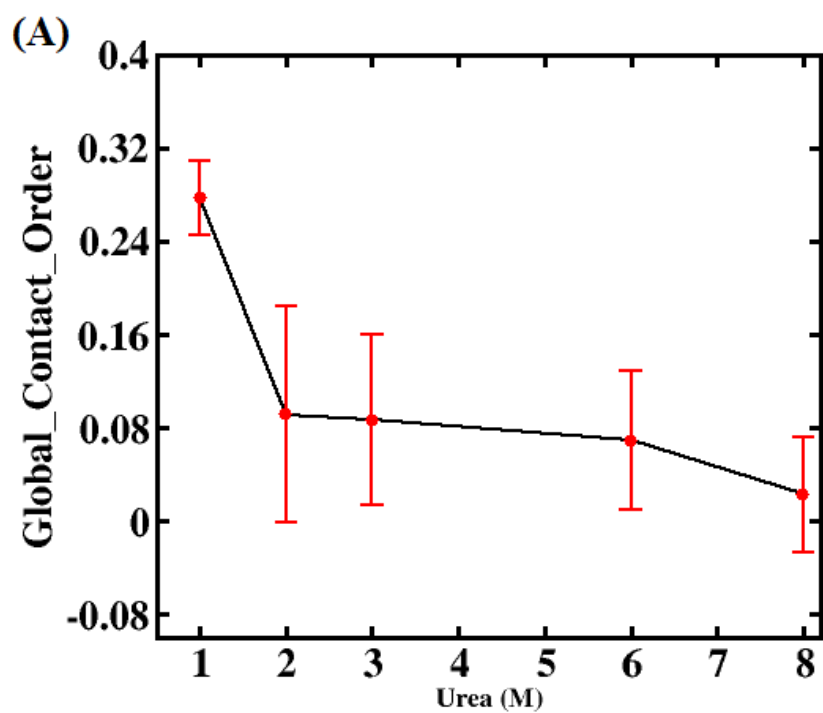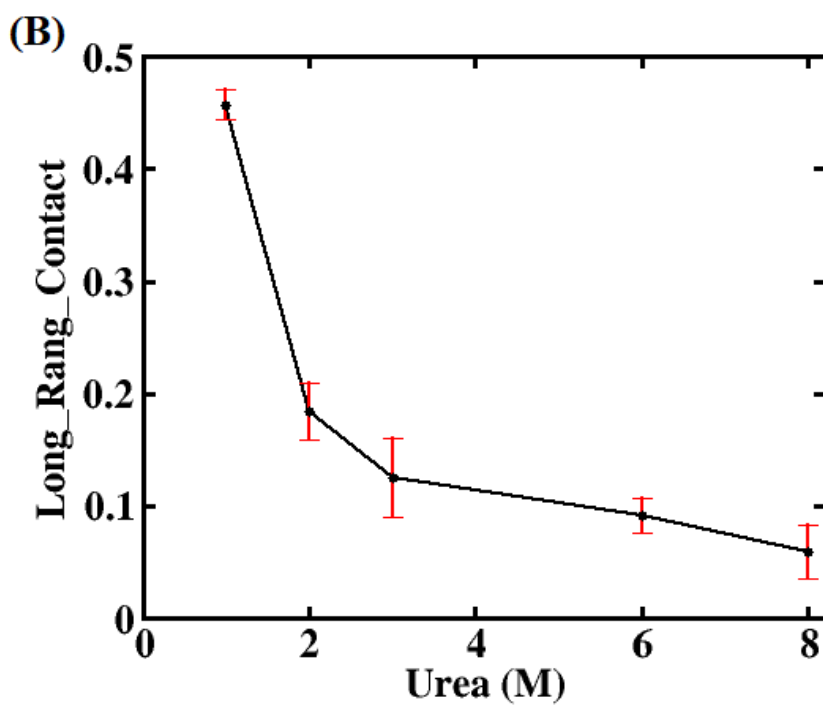

**Figure S22.** (A) shows the global contact order (GOC) and (B) Long-range fraction to distinguish unfolded conformers.

**1.0 M**

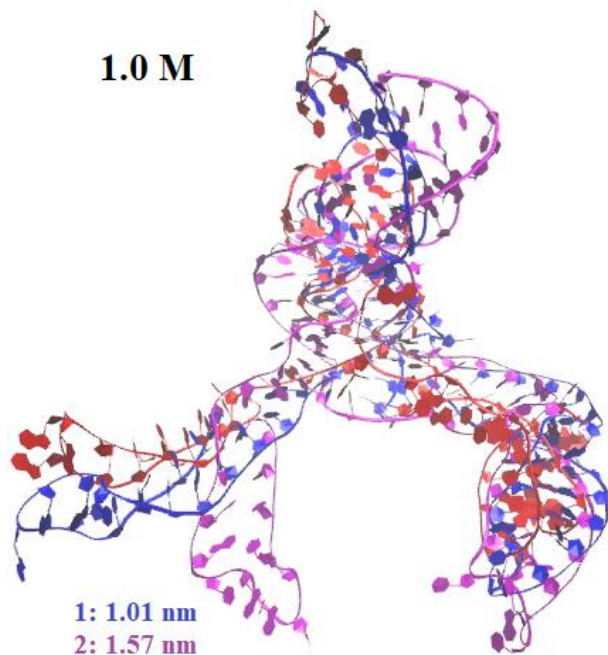

**2.0 M**

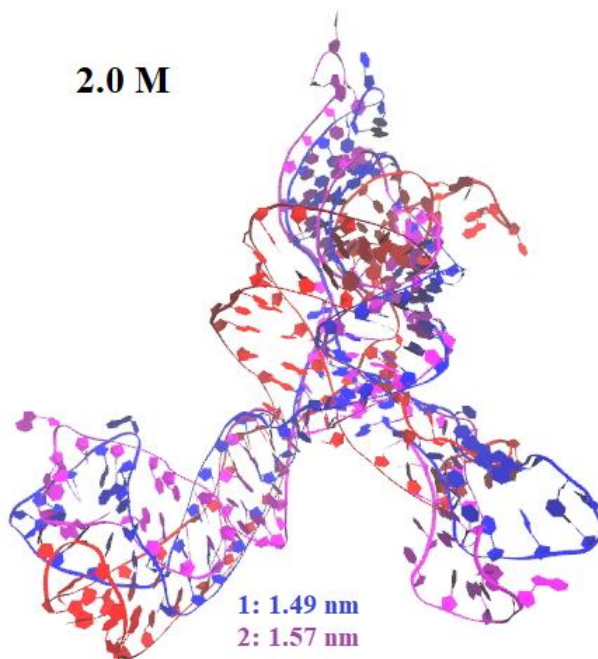

**3.0 M**

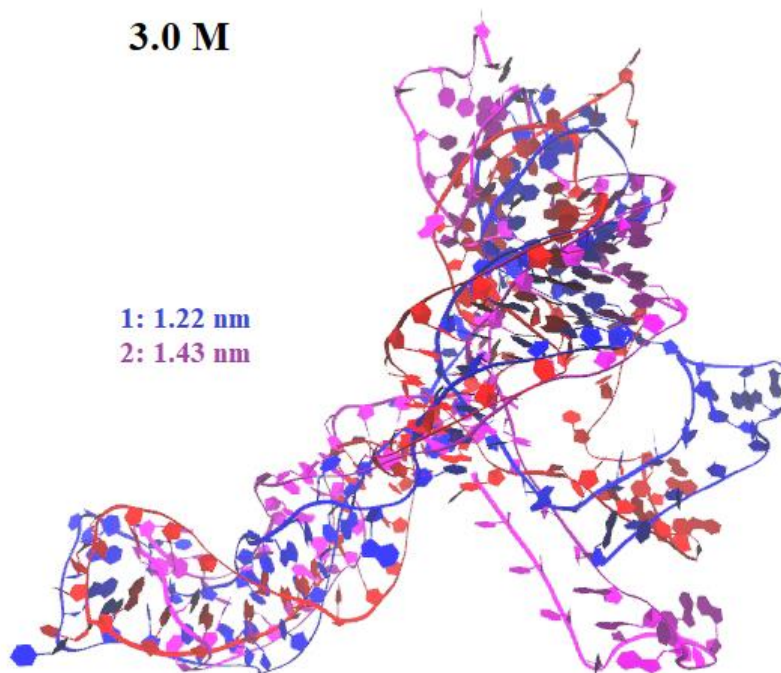

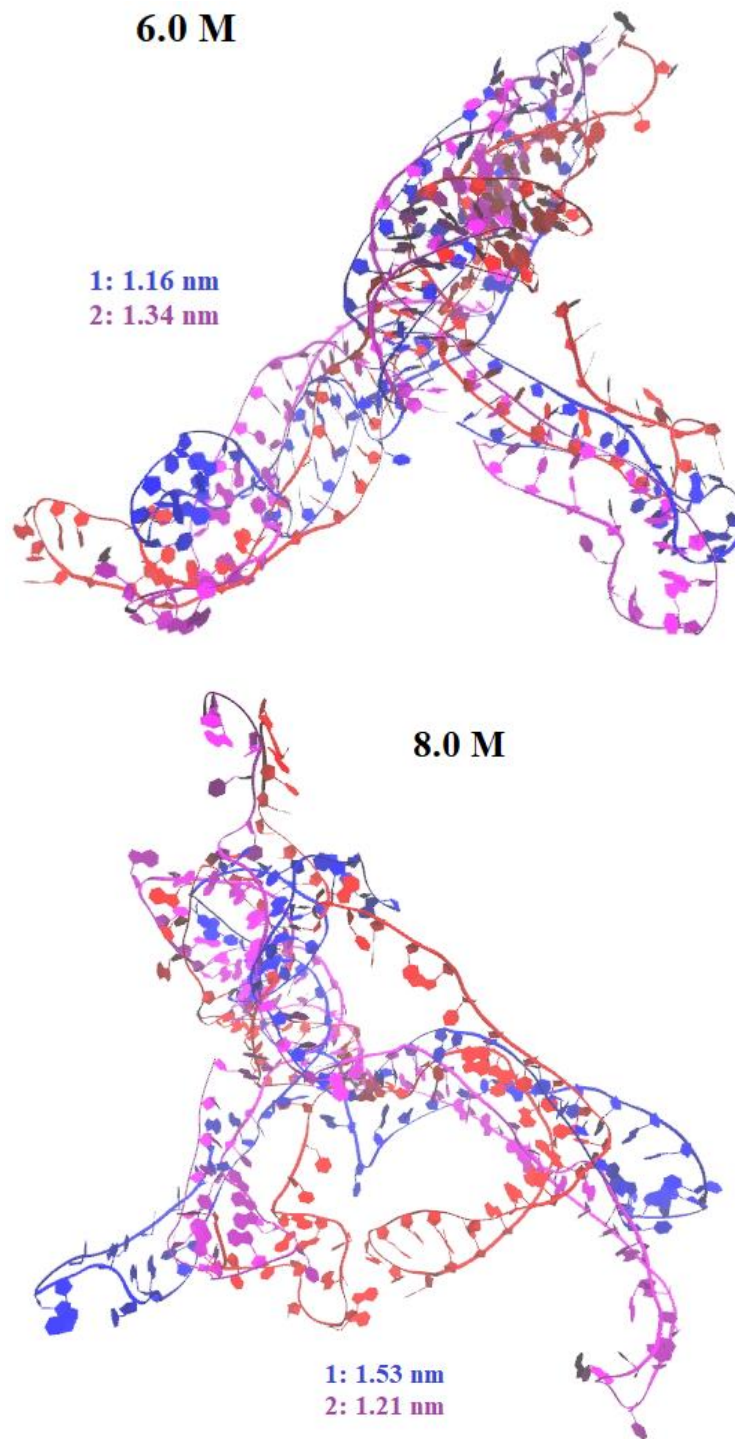

**Figure S23.** Overlay of structures obtained from CHARMM36 ff (245 ns: red) and AMBER99SB-ILDN ff (150 ns: blue; 300 ns: purple). RMSD for each structure obtained from AMBER99SB-ILDN ff with respect to CHARMM36 ff is provided.
